# Supplementary material
Source: publisher figshare collection journal article supplement (https://diabetesjournals.figshare.com/articles/dataset/_/19184360)
Supplement: Supplementary file 2 [file 1]

Supplementary Table 1: Number and percentage of cells in different cellular clusters in diabetic and non-diabetic skin samples

| Cell type   | Total number of cells | diabetic | non-diabetic | diabetic % | non-diabetic % |
|-------------|-----------------------|----------|--------------|------------|----------------|
| Endo        | 7470                  | 1736     | 5734         | 14.79      | 23.16          |
| T cells     | 4827                  | 1627     | 3200         | 13.87      | 12.93          |
| Fibro A     | 4486                  | 1610     | 2876         | 13.72      | 11.62          |
| Fibro B     | 4002                  | 1229     | 2773         | 10.47      | 11.20          |
| SMC         | 3494                  | 1236     | 2258         | 10.53      | 9.12           |
| NK cells    | 3437                  | 1208     | 2229         | 10.29      | 9.00           |
| Kera A      | 3340                  | 1197     | 2143         | 10.20      | 8.66           |
| Myeloid     | 2625                  | 1004     | 1621         | 8.56       | 6.55           |
| Mast cells  | 1000                  | 376      | 624          | 3.20       | 2.52           |
| LEC         | 682                   | 200      | 482          | 1.70       | 1.95           |
| Kera B      | 663                   | 237      | 426          | 2.02       | 1.72           |
| Melanocytes | 461                   | 74       | 387          | 0.63       | 1.56           |

Supplementary Table 2

**Supplementary Table 2:** Downregulated genes in one (423) or more cluster (151) in diabetic skin

Genes downregulated in more than one cluster

| Gene name | Endo     | T cells  | Fibro A  | Fibro B  | SMC      | NK cells | Kera A   | Myeloid  | Mast cells   | LEC      | Kera B   | Melanocytes  |
|-----------|----------|----------|----------|----------|----------|----------|----------|----------|--------------|----------|----------|--------------|
| PLCG2     | -0.51829 | -1.61827 | -0.89538 | -0.85789 | -0.55076 | -1.51154 | -0.84698 | -0.67542 | -1.222980388 | -0.78138 |          | -0.718233163 |
| MT2A      | -0.70444 | -1.74069 | -1.34467 | -0.98279 | -1.55382 | -2.68495 | -1.25257 | -1.48945 | -1.496837228 |          |          | -1.017690984 |
| MT1E      | -0.51328 | -1.65455 | -1.20844 | -1.08032 | -1.50535 | -2.65874 | -1.16908 | -0.84116 |              |          |          | -1.22026088  |
| RPS10     | -0.61655 | -0.71939 | -0.65034 | -0.64287 | -0.75537 | -0.7076  | -0.64517 | -0.71343 |              | -0.84976 |          |              |
| TSC22D3   | -0.42221 | -0.69964 | -1.07574 | -0.62338 |          | -0.65375 | -0.56204 | -0.76217 | -0.826420517 |          |          |              |
| MT1X      | -0.68748 | -1.76328 | -0.83974 | -0.82603 | -1.55297 | -2.943   | -0.74536 | -1.29597 |              |          |          |              |
| XIST      | -1.56524 | -1.00625 | -1.45624 | -1.02171 | -1.40814 |          | -1.69664 | -1.54221 |              | -1.4604  |          |              |
| CFD       |          | -0.37461 | -0.4973  | -0.6487  | -0.29393 | -0.30952 | -0.76735 |          |              |          | -1.587   |              |
| S100A10   |          | -0.34742 | -0.63087 |          |          | -0.28596 | -0.41222 | -0.71745 | -0.627556477 | -0.89269 |          |              |
| RPS4X     |          | -0.30438 |          |          |          | -0.30731 | -0.57456 | -0.4485  |              | -0.34288 | -0.70079 |              |
| HNRNPH1   | -0.2675  | -0.32618 | -0.56399 | -0.31782 | -0.27281 |          |          | -0.28832 |              |          |          |              |
| RPL5      |          | -0.30521 |          |          |          | -0.33147 |          | -0.26333 |              | -0.35603 | -0.29843 |              |
| MTRNR2L1  |          |          | -1.06131 | -1.15493 | -0.86218 |          |          | -1.02078 |              |          |          | -1.93419504  |
| SELENOW   | -0.70607 |          | -0.58334 | -0.48046 |          |          | -0.41271 |          |              | -0.67499 |          |              |
| GLUL      |          | -0.35277 | -0.48511 | -0.43019 |          | -0.26844 |          |          | -0.374979519 |          |          |              |
| EMP1      | -0.63973 |          | -0.2882  |          |          |          |          | -0.5986  |              | -0.95891 |          | -0.687732748 |
| MTRNR2L8  |          | -1.36495 | -0.93336 | -0.88779 |          | -1.1551  |          | -0.96418 |              |          |          |              |
| PDK4      | -0.9275  |          | -0.58305 | -0.52533 | -1.03026 |          | -0.29733 |          |              |          |          |              |
| MT-ND4    |          |          | -0.34704 | -0.42785 |          |          |          |          | -0.369765169 |          | -0.9111  | -0.339265244 |
| TXNIP     | -0.37089 | -1.15252 |          |          |          | -0.64823 | -0.57049 | -0.33961 |              |          |          |              |
| CST3      |          |          | -0.63124 | -0.31239 | -0.40714 |          | -0.57815 | -0.72345 |              |          |          |              |
| AMD1      | -0.27481 |          | -0.29165 | -0.26657 | -0.31356 |          |          |          |              |          |          |              |
| MT-ND4L   |          |          | -0.46317 | -0.47449 |          |          |          |          | -0.295184574 |          |          | -0.434036559 |
| DCN       |          | -0.26316 | -0.25791 |          |          |          |          | -0.28952 |              |          | -0.63459 |              |
| HSPA8     |          | -0.36996 | -0.29255 |          | -0.34533 | -0.40919 |          |          |              |          |          |              |
| TPPP3     |          |          | -0.96786 | -0.6631  |          |          | -0.80706 |          |              | -0.61637 |          |              |
| KLF9      | -0.29088 |          |          |          | -0.39013 |          | -0.32722 | -0.4548  |              |          |          |              |
| TXN       |          | -0.26626 | -0.34345 |          | -0.27977 |          |          |          | -0.459182072 |          |          |              |
| HSPH1     |          | -0.61201 | -0.40378 |          |          | -0.62171 |          | -0.50868 |              |          |          |              |
| RPL36A    |          | -0.27653 |          |          | -0.27121 | -0.30409 |          | -0.33125 |              |          |          |              |
| PHLDA1    | -0.32112 | -0.29653 | -0.29581 |          | -0.42253 |          |          |          |              |          |          |              |
| LGALS1    |          | -0.26655 | -0.30962 |          |          | -0.40176 |          |          | -0.512993711 |          |          |              |
| PLAC9     |          |          | -0.90262 | -0.44301 | -0.26511 |          |          |          |              | -0.61077 |          |              |
| FKBP5     | -0.29861 | -0.47995 |          |          | -0.57148 | -0.62695 |          |          |              |          |          |              |
| CEBPD     | -0.4186  |          |          |          | -0.46858 | -0.27758 |          | -0.55057 |              |          |          |              |
| TMSB4X    |          |          | -0.52524 |          |          |          |          |          |              | -0.36397 | -0.57502 |              |
| MINOS1    |          |          | -0.41778 | -0.41671 |          |          | -0.27935 |          |              |          |          |              |
| ISG15     | -0.74242 |          | -0.31826 |          | -0.67189 |          |          |          |              |          |          |              |
| FGL2      |          |          | -0.67402 | -0.62346 |          |          |          | -0.69652 |              |          |          |              |
| KIAA0930  |          |          | -0.53335 | -0.27507 |          |          |          |          |              |          |          | -0.575935045 |
| CRIP2     |          |          | -0.46312 |          |          |          | -0.33277 |          |              | -0.42426 |          |              |
| TAGLN2    |          |          | -0.5027  |          |          |          | -0.29156 | -0.47576 |              |          |          |              |
| MT1A      |          |          | -0.55071 | -0.55483 | -1.29893 |          |          |          |              |          |          |              |
| ZFAND5    |          |          | -0.31068 |          | -0.28277 |          |          | -0.36477 |              |          |          |              |
| SAMHD1    | -0.28829 |          | -0.39587 |          | -0.30211 |          |          |          |              |          |          |              |
| HMCN1     |          |          | -0.40296 | -0.3525  |          |          |          |          |              | -0.40499 |          |              |
| FABP5     | -0.53741 |          |          |          | -0.28701 |          |          |          |              |          | -1.31885 |              |
| NOVA1     |          |          | -0.38276 | -0.40582 |          |          |          |          |              |          | -1.06777 |              |
| SRP14     | -0.34471 |          |          |          |          |          |          |          |              | -0.32999 | -0.29037 |              |
| HSP90AA1  |          | -0.49823 |          |          | -0.44947 |          |          | -0.54222 |              |          |          |              |
| DNAJB1    | -0.36478 |          |          |          | -0.72994 |          |          | -0.54892 |              |          |          |              |
| AKAP13    |          |          | -0.26622 |          |          |          |          | -0.32863 | -0.49084144  |          |          |              |
| GSTM3     |          |          | -0.35572 | -0.28747 |          |          | -0.4804  |          |              |          |          |              |
| HES4      |          |          | -0.38174 |          | -0.5264  |          |          |          | -0.64139209  |          |          |              |
| MTRNR2L12 |          |          | -0.26393 | -0.29888 |          | -0.29433 |          |          |              |          |          |              |
| TSC22D1   |          |          | -0.72355 |          |          |          | -0.2619  |          | -0.648557435 |          |          |              |
| MT-CO1    |          |          | -0.3173  | -0.2892  |          |          |          |          |              |          | -0.6447  |              |
| CD55      |          |          | -0.6514  | -0.85935 |          |          |          | -0.29887 |              |          |          |              |
| GSN       | -0.3434  |          | -0.48334 |          |          |          | -0.32464 |          |              |          |          |              |
| MT1M      |          |          | -1.29712 | -1.21224 | -1.57625 |          |          |          |              |          |          |              |
| HLA-DRB5  | -0.41129 |          |          |          |          | -0.40889 |          | -0.91061 |              |          |          |              |
| DYNLL1    |          | -0.29377 | -0.34331 |          |          |          | -0.44079 |          |              |          |          |              |
| NDUFA11   |          |          | -0.29797 | -0.2866  |          |          | -0.25197 |          |              |          |          |              |
| PLIN2     | -0.70495 |          |          |          |          |          | -0.4021  |          | -0.425369152 |          |          |              |
| DPYSL2    |          |          | -0.41773 |          |          |          |          |          | -0.517394542 |          |          | -0.847981119 |
| PABPC4    |          | -0.28949 |          |          |          |          |          | -0.31016 | -0.427726324 |          |          |              |

Supplementary Table 2

|          |          |          |          |          |          |              |              |
|----------|----------|----------|----------|----------|----------|--------------|--------------|
| RPL15    |          |          |          | -0.32584 | -0.26255 | -0.27675     |              |
| BGN      |          | -0.48384 | -0.47471 |          |          |              |              |
| C1orf56  |          |          |          | -0.27746 | -0.34128 |              |              |
| ANXA4    |          | -0.40243 | -0.36096 |          |          |              |              |
| NTM      |          |          | -0.26926 |          |          | -0.787203283 |              |
| YBX3     |          |          |          | -0.34187 |          | -0.490025139 |              |
| HSPD1    |          |          |          | -0.2994  | -0.53737 |              |              |
| ODC1     | -0.27292 |          |          |          |          |              | -1.57202     |
| GAS1     |          | -0.46334 | -0.37053 |          |          |              |              |
| STMN1    |          | -0.27019 |          |          |          |              | -1.79192     |
| PLP2     |          | -0.27099 |          | -0.30701 |          |              |              |
| MAMDC2   |          | -0.59234 | -0.29675 |          |          |              |              |
| PI16     |          | -0.9364  | -0.86466 |          |          |              |              |
| HSP90AB1 |          |          |          | -0.25169 | -0.2944  |              |              |
| MAFB     |          | -0.49643 | -0.35195 |          |          |              |              |
| IFI6     | -0.69019 |          |          | -0.66825 |          |              |              |
| ABLIM1   |          | -0.51869 | -0.4601  |          |          |              |              |
| SPON2    |          |          |          | -0.48921 | -0.31641 |              |              |
| DKK2     |          | -0.38534 | -0.35941 |          |          |              |              |
| VEGFB    |          | -0.30213 | -0.37112 |          |          |              |              |
| IFNGR1   |          |          |          |          | -0.39753 | -0.469798175 |              |
| SPARC    |          | -0.45873 | -0.74692 |          |          |              |              |
| ESYT2    |          | -0.31206 |          |          |          | -0.427297891 |              |
| PRDM1    |          | -0.36333 |          | -0.3515  |          |              |              |
| PRELP    |          | -0.32754 |          |          |          |              | -0.514571263 |
| CPQ      |          | -0.46067 | -0.49325 |          |          |              |              |
| DDX3X    | -0.28456 |          |          | -0.28196 |          |              |              |
| CLEC11A  |          | -0.34123 | -0.46276 |          |          |              |              |
| HLA-DQA2 | -0.79236 |          |          |          | -0.95838 |              |              |
| ANXA1    |          |          |          |          | -0.40609 |              | -0.537935229 |
| LTBP4    |          | -0.8311  | -0.45264 |          |          |              |              |
| ACKR3    |          | -0.50398 | -0.42836 |          |          |              |              |
| GSTP1    |          |          |          | -0.44941 |          |              | -0.51106     |
| CKB      |          |          |          | -0.28237 |          |              | -0.85408     |
| TNXB     |          | -0.88375 | -0.37198 |          |          |              |              |
| COL5A1   |          | -0.32296 | -0.25878 |          |          |              |              |
| LPAR6    |          | -0.4566  |          | -0.462   |          |              |              |
| FBLN2    |          | -0.45008 | -0.35248 |          |          |              |              |
| CRABP2   |          |          | -0.33398 |          |          |              | -1.25347     |
| SPARCL1  | -0.40323 | -1.08891 |          |          |          |              |              |
| AP1S2    |          |          |          |          |          |              | -1.37364     |
| TUBB2A   |          | -0.30543 |          |          |          |              | -0.585902618 |
| MAML2    |          | -0.29751 |          |          |          | -0.403869121 | -2.14209     |
| TUBA1B   |          | -0.30403 |          |          |          |              | -0.75739     |
| PCSK1N   |          |          | -0.4453  |          |          |              | -2.40024     |
| KRT10    |          |          | -0.26069 | -0.82497 |          |              |              |
| ANGPTL1  |          | -0.9719  | -0.67573 |          |          |              |              |
| STC1     | -0.80954 |          |          |          |          |              | -0.8037      |
| ABCC9    |          | -0.34722 | -0.30007 |          |          |              |              |
| PHF20    |          |          |          | -0.32896 |          | -0.376242178 |              |
| ANKRD28  |          | -0.39239 |          |          | -0.3962  |              |              |
| ADRB2    | -0.36268 |          |          | -0.38184 |          |              |              |
| IL6ST    |          | -0.30985 |          | -0.25819 |          |              |              |
| UBB      |          | -0.30301 |          | -0.2718  |          |              |              |
| HSPB1    |          | -0.33181 |          |          | -0.73136 |              |              |
| CLK1     |          | -0.26105 |          | -0.27463 |          |              |              |
| SOX4     |          | -0.28575 |          |          |          |              | -1.79864     |
| DEFB1    |          |          | -0.45588 | -0.45578 |          |              |              |
| CES1     |          | -0.32475 | -0.4616  |          |          |              |              |
| FBLN1    |          | -0.77964 | -0.47717 |          |          |              |              |
| CCDC80   |          | -0.90537 | -0.67581 |          |          |              |              |
| DUSP1    |          | -0.468   |          |          | -0.35648 |              |              |
| CCPG1    |          | -0.29446 | -0.29595 |          |          |              |              |
| GOLIM4   |          | -0.37095 | -0.29703 |          |          |              |              |
| DDIT4    |          | -0.29078 |          | -0.3101  |          |              |              |
| CASC4    |          | -0.28677 | -0.28713 |          |          |              |              |
| OMD      |          | -0.35084 | -0.61405 |          |          |              |              |
| DNAJA1   | -0.30245 |          |          | -0.34791 |          |              |              |
| LEPR     |          | -0.72288 | -0.40868 |          |          |              |              |

Supplementary Table 2

|                                  |          |          |          |          |     |          |          |          |            |              |          |             |              |
|----------------------------------|----------|----------|----------|----------|-----|----------|----------|----------|------------|--------------|----------|-------------|--------------|
| TOB1                             |          | -0.60473 |          |          |     |          | -0.45849 |          |            |              |          |             |              |
| MTUS1                            | -0.29074 |          | -0.25491 |          |     |          |          |          |            |              |          |             |              |
| ANXA2                            |          |          | -0.42297 |          |     |          |          | -0.28583 |            |              |          |             |              |
| HTRA3                            |          |          | -0.5678  | -0.48117 |     |          |          |          |            |              |          |             |              |
| TMSB10                           |          |          |          |          |     |          |          |          |            | -0.26255     | -0.58678 |             |              |
| HMGN3                            |          |          | -0.31272 |          |     |          |          |          |            | -0.52351     |          |             |              |
| NBL1                             |          |          | -0.45649 | -0.28066 |     |          |          |          |            |              |          |             |              |
| MAT2A                            | -0.26205 |          |          |          |     | -0.2972  |          |          |            |              |          |             |              |
| CAPG                             |          |          |          |          |     |          |          | -0.27132 |            | -0.383368287 |          |             |              |
| MYADM                            |          |          |          |          |     |          |          |          | -0.32708   |              |          |             |              |
| PTMS                             |          |          |          |          |     |          |          |          |            | -0.72164     |          |             |              |
| NPDC1                            | -0.26987 |          | -0.35646 |          |     |          |          |          |            | -0.29383     | -0.6883  |             |              |
| GNG11                            | -0.38981 |          | -0.28648 |          |     |          |          |          |            |              |          |             |              |
| PTMA                             |          |          |          |          |     |          |          | -0.27031 |            | -0.32707     |          |             |              |
| SEMA3C                           |          |          | -0.28281 |          |     |          |          |          |            |              |          |             | -0.573092443 |
| MXRA5                            |          |          | -0.59055 | -0.34091 |     |          |          |          |            |              |          |             |              |
| Genes upregulated in one cluster |          |          |          |          |     |          |          |          |            |              |          |             |              |
| Gene name                        | Endo     | T cells  | Fibro A  | Fibro B  | SMC | NK cells | Kera A   | Myeloid  | Mast cells | LEC          | Kera B   | Melanocytes |              |
| IFI44L                           | -0.77901 |          |          |          |     |          |          |          |            |              |          |             |              |
| ENPP2                            | -0.7775  |          |          |          |     |          |          |          |            |              |          |             |              |
| CLDN5                            | -0.66649 |          |          |          |     |          |          |          |            |              |          |             |              |
| CTSH                             | -0.64249 |          |          |          |     |          |          |          |            |              |          |             |              |
| IFIT1                            | -0.6255  |          |          |          |     |          |          |          |            |              |          |             |              |
| BST2                             | -0.60656 |          |          |          |     |          |          |          |            |              |          |             |              |
| LY6E                             | -0.57362 |          |          |          |     |          |          |          |            |              |          |             |              |
| CYTL1                            | -0.52489 |          |          |          |     |          |          |          |            |              |          |             |              |
| ADAMTS1                          | -0.52324 |          |          |          |     |          |          |          |            |              |          |             |              |
| MX1                              | -0.49528 |          |          |          |     |          |          |          |            |              |          |             |              |
| IFIT3                            | -0.48715 |          |          |          |     |          |          |          |            |              |          |             |              |
| MAP1LC3B                         | -0.47122 |          |          |          |     |          |          |          |            |              |          |             |              |
| XAF1                             | -0.44893 |          |          |          |     |          |          |          |            |              |          |             |              |
| SCARB1                           | -0.44225 |          |          |          |     |          |          |          |            |              |          |             |              |
| SERPING1                         | -0.41936 |          |          |          |     |          |          |          |            |              |          |             |              |
| TGFBR2                           | -0.39824 |          |          |          |     |          |          |          |            |              |          |             |              |
| APOLD1                           | -0.37109 |          |          |          |     |          |          |          |            |              |          |             |              |
| TFPI                             | -0.35666 |          |          |          |     |          |          |          |            |              |          |             |              |
| IFI44                            | -0.32804 |          |          |          |     |          |          |          |            |              |          |             |              |
| TMEM70                           | -0.32362 |          |          |          |     |          |          |          |            |              |          |             |              |
| EIF2AK2                          | -0.32352 |          |          |          |     |          |          |          |            |              |          |             |              |
| AKR1C3                           | -0.31791 |          |          |          |     |          |          |          |            |              |          |             |              |
| PIK3R3                           | -0.31631 |          |          |          |     |          |          |          |            |              |          |             |              |
| MGLL                             | -0.3076  |          |          |          |     |          |          |          |            |              |          |             |              |
| FAM13C                           | -0.30104 |          |          |          |     |          |          |          |            |              |          |             |              |
| LNX1                             | -0.28764 |          |          |          |     |          |          |          |            |              |          |             |              |
| NASP                             | -0.27542 |          |          |          |     |          |          |          |            |              |          |             |              |
| PECAM1                           | -0.27092 |          |          |          |     |          |          |          |            |              |          |             |              |
| ATP5MC3                          | -0.26828 |          |          |          |     |          |          |          |            |              |          |             |              |
| OSBPL1A                          | -0.26739 |          |          |          |     |          |          |          |            |              |          |             |              |
| MCF2L                            | -0.26571 |          |          |          |     |          |          |          |            |              |          |             |              |
| ELOVL7                           | -0.26543 |          |          |          |     |          |          |          |            |              |          |             |              |
| CPVL                             | -0.26289 |          |          |          |     |          |          |          |            |              |          |             |              |
| FILIP1                           | -0.26266 |          |          |          |     |          |          |          |            |              |          |             |              |
| CXorf36                          | -0.26117 |          |          |          |     |          |          |          |            |              |          |             |              |
| ZC3HAV1                          | -0.26074 |          |          |          |     |          |          |          |            |              |          |             |              |
| DUSP23                           | -0.25909 |          |          |          |     |          |          |          |            |              |          |             |              |
| DDX58                            | -0.25799 |          |          |          |     |          |          |          |            |              |          |             |              |
| THSD7A                           | -0.2508  |          |          |          |     |          |          |          |            |              |          |             |              |
| BATF                             |          | -0.43531 |          |          |     |          |          |          |            |              |          |             |              |
| CRYBG1                           |          | -0.35933 |          |          |     |          |          |          |            |              |          |             |              |
| JAML                             |          | -0.2812  |          |          |     |          |          |          |            |              |          |             |              |
| SEPT11                           |          | -0.27897 |          |          |     |          |          |          |            |              |          |             |              |
| RBMS1                            |          | -0.25724 |          |          |     |          |          |          |            |              |          |             |              |
| MFAP5                            |          |          | -0.79127 |          |     |          |          |          |            |              |          |             |              |
| DPT                              |          |          | -0.76368 |          |     |          |          |          |            |              |          |             |              |
| IGFBP7                           |          |          | -0.69017 |          |     |          |          |          |            |              |          |             |              |
| CFH                              |          |          | -0.61326 |          |     |          |          |          |            |              |          |             |              |
| IGFBP6                           |          |          | -0.54932 |          |     |          |          |          |            |              |          |             |              |
| PLXDC1                           |          |          | -0.54334 |          |     |          |          |          |            |              |          |             |              |
| APCDD1                           |          |          | -0.53306 |          |     |          |          |          |            |              |          |             |              |

Supplementary Table 2

|          |          |
|----------|----------|
| CLEC3B   | -0.52001 |
| SDC2     | -0.5091  |
| TRPS1    | -0.48686 |
| ZBTB20   | -0.47576 |
| SVIL     | -0.4733  |
| DPYSL3   | -0.46593 |
| ELN      | -0.46114 |
| ABI3BP   | -0.4509  |
| SPTBN1   | -0.44321 |
| TACC1    | -0.42466 |
| MXRA7    | -0.41706 |
| SH3BGRL3 | -0.41605 |
| ABCA8    | -0.40272 |
| FBN1     | -0.40108 |
| OLFML2B  | -0.38761 |
| PTN      | -0.38567 |
| SYNE1    | -0.37273 |
| CCDC186  | -0.37008 |
| PLEKHH2  | -0.36765 |
| CD34     | -0.36723 |
| TMOD3    | -0.36315 |
| ANTXR1   | -0.36254 |
| ARL6IP5  | -0.36077 |
| PSD3     | -0.34215 |
| AXL      | -0.33391 |
| GAS7     | -0.33347 |
| NFIA     | -0.3334  |
| TIMP3    | -0.33318 |
| IL16     | -0.33286 |
| LUM      | -0.32643 |
| LTBP3    | -0.32597 |
| EPB41L2  | -0.31327 |
| ANK2     | -0.3125  |
| BMP4     | -0.31015 |
| DYNC2LI1 | -0.30811 |
| DIO2     | -0.30769 |
| COLEC12  | -0.30127 |
| WEE1     | -0.2971  |
| GADD45G  | -0.29478 |
| CTNNB1   | -0.2905  |
| F2R      | -0.28972 |
| ID3      | -0.28833 |
| ZNF706   | -0.28674 |
| EMP3     | -0.28652 |
| PMEPA1   | -0.28646 |
| PER2     | -0.28374 |
| TUBB4B   | -0.28366 |
| COL5A2   | -0.28327 |
| HNRNPDL  | -0.28303 |
| NFIX     | -0.28281 |
| OSR1     | -0.28029 |
| BLOC1S1  | -0.2798  |
| TMEM43   | -0.27755 |
| EIF4A2   | -0.27735 |
| LIMCH1   | -0.2766  |
| PGRMC1   | -0.27617 |
| PREX2    | -0.27514 |
| PALLD    | -0.27352 |
| KLF4     | -0.27307 |
| MAN1A1   | -0.27199 |
| NORAD    | -0.27099 |
| CTSF     | -0.27035 |
| DNM1     | -0.27031 |
| SRSF2    | -0.26797 |
| RBM6     | -0.26786 |
| ARGLU1   | -0.26706 |
| PAM      | -0.26644 |
| WWTR1    | -0.26595 |
| MOB3B    | -0.26591 |

Supplementary Table 2

|          |          |          |
|----------|----------|----------|
| SEPT7    | -0.26523 |          |
| CAMK1D   | -0.26395 |          |
| RGS10    | -0.26395 |          |
| ADAM33   | -0.26251 |          |
| REEP5    | -0.26204 |          |
| ECM1     | -0.26172 |          |
| C9orf3   | -0.26007 |          |
| SNHG7    | -0.25969 |          |
| DDAH2    | -0.25691 |          |
| GPSM2    | -0.25567 |          |
| GLDN     | -0.25464 |          |
| ADD3     | -0.2524  |          |
| MEOX2    | -0.25235 |          |
| IRS2     | -0.25217 |          |
| SNRPN    | -0.25144 |          |
| ID1      | -0.25005 |          |
| SLPI     | -1.54995 |          |
| C1QTNF3  | -0.76975 |          |
| MATN4    | -0.67267 |          |
| ITIH5    | -0.61034 |          |
| LRRC15   | -0.54122 |          |
| MFGE8    | -0.49319 |          |
| CERCAM   | -0.47858 |          |
| NUCB2    | -0.46318 |          |
| FNDC1    | -0.45069 |          |
| FAP      | -0.44733 |          |
| SEMA3B   | -0.44044 |          |
| ANGPTL5  | -0.43049 |          |
| PPIC     | -0.40564 |          |
| CYBRD1   | -0.37934 |          |
| VKORC1   | -0.37742 |          |
| P4HA2    | -0.36184 |          |
| FAM180B  | -0.3486  |          |
| PCOLCE2  | -0.34208 |          |
| PCOLCE   | -0.34179 |          |
| XG       | -0.33538 |          |
| CITED2   | -0.32734 |          |
| ADGRA2   | -0.32559 |          |
| PRDX4    | -0.30593 |          |
| HAS2     | -0.30591 |          |
| FKBP7    | -0.30113 |          |
| KDELRL3  | -0.29378 |          |
| C1QTNF7  | -0.28753 |          |
| PDGFRL   | -0.28664 |          |
| SKAP2    | -0.28316 |          |
| OGN      | -0.28086 |          |
| C1QTNF4  | -0.28043 |          |
| AIF1L    | -0.27517 |          |
| CHPF     | -0.27172 |          |
| OSR2     | -0.26525 |          |
| GSTM5    | -0.26352 |          |
| SERPINA5 | -0.26222 |          |
| LRRC17   | -0.26198 |          |
| MMP27    | -0.26054 |          |
| RECK     | -0.25322 |          |
| CCL8     |          | -0.8383  |
| CH25H    |          | -0.60632 |
| AVPR1A   |          | -0.59526 |
| RGS5     |          | -0.53366 |
| MYC      |          | -0.49778 |
| NCKAP5   |          | -0.49622 |
| ANGPT2   |          | -0.48011 |
| MTHFD2   |          | -0.46523 |
| C2orf40  |          | -0.43381 |
| CLMN     |          | -0.40702 |
| ZNF331   |          | -0.3769  |
| ANGPTL4  |          | -0.33705 |
| ADRA2A   |          | -0.32314 |
| SNHG15   |          | -0.31405 |

Supplementary Table 2

|           |          |
|-----------|----------|
| COX4I2    | -0.30969 |
| ENPEP     | -0.30347 |
| GGCX      | -0.28732 |
| LBH       | -0.28328 |
| MEF2C     | -0.28233 |
| NUDT4     | -0.28219 |
| RRAD      | -0.27053 |
| MCL1      | -0.26835 |
| KLHL23    | -0.2658  |
| CYTH3     | -0.25329 |
| MT1F      | -1.41651 |
| AREG      | -0.65314 |
| SLC30A1   | -0.48577 |
| FGFBP2    | -0.37768 |
| CMC1      | -0.32381 |
| GNLY      | -0.32011 |
| ISG20     | -0.28525 |
| SKI       | -0.28444 |
| DEDD2     | -0.28386 |
| LINC01871 | -0.28314 |
| RPL27     | -0.27703 |
| ATP5IF1   | -0.25786 |
| ELL2      | -0.25664 |
| GLRX      | -0.25527 |
| LGALS7    | -1.45927 |
| KRT1      | -0.92113 |
| MT1G      | -0.88288 |
| KRTDAP    | -0.86028 |
| HOPX      | -0.71286 |
| DMKN      | -0.70337 |
| LY6D      | -0.66791 |
| CALML5    | -0.64173 |
| SYT8      | -0.61808 |
| MT4       | -0.61555 |
| CCL27     | -0.58423 |
| HBA2      | -0.5643  |
| DSG1      | -0.55309 |
| EPHB6     | -0.55033 |
| KCNK7     | -0.54356 |
| PHLDA2    | -0.53725 |
| LGALS7B   | -0.53064 |
| DSP       | -0.52483 |
| CSTA      | -0.52185 |
| SBSN      | -0.49566 |
| DSC1      | -0.49261 |
| S100A14   | -0.49127 |
| PYCARD    | -0.49041 |
| ALDH3A2   | -0.48217 |
| ALDH3A1   | -0.4708  |
| AHNAK2    | -0.46498 |
| IL18      | -0.43455 |
| CYB5A     | -0.43232 |
| CCND1     | -0.42449 |
| RNH1      | -0.41843 |
| S100A16   | -0.41199 |
| GLTP      | -0.40769 |
| PKP1      | -0.39295 |
| LAMTOR4   | -0.37774 |
| SDC1      | -0.37387 |
| EMP2      | -0.37155 |
| RAB25     | -0.37154 |
| CLTB      | -0.36399 |
| JUP       | -0.35814 |
| WNT4      | -0.34775 |
| CHP2      | -0.34042 |
| CASP14    | -0.32774 |
| EPPK1     | -0.3274  |
| CLDN1     | -0.32406 |
| LGALS1    | -0.31102 |

Supplementary Table 2

|          |          |              |
|----------|----------|--------------|
| TRIM29   | -0.29809 |              |
| ZBTB7B   | -0.29716 |              |
| OGFRL1   | -0.29375 |              |
| FGFBP1   | -0.29348 |              |
| SULT2B1  | -0.29249 |              |
| CEBPA    | -0.29109 |              |
| IMPA2    | -0.29104 |              |
| SYTL1    | -0.28551 |              |
| DSC3     | -0.28278 |              |
| PKP3     | -0.28147 |              |
| EGR3     | -0.28104 |              |
| PPP1R16A | -0.27649 |              |
| LYPD3    | -0.27438 |              |
| ANO1     | -0.2737  |              |
| CD109    | -0.2728  |              |
| ITM2B    | -0.27137 |              |
| EIF2S3   | -0.26555 |              |
| DUSP2    | -0.26479 |              |
| TKT      | -0.26012 |              |
| KLK8     | -0.2588  |              |
| CAMSAP3  | -0.2583  |              |
| HBEGF    | -0.25662 |              |
| KLF13    | -0.25501 |              |
| MGST2    | -0.25304 |              |
| CAPNS2   | -0.25174 |              |
| CLCA4    | -0.25033 |              |
| IL1R2    |          | -0.97793     |
| FCER1A   |          | -0.90695     |
| LGALS2   |          | -0.71018     |
| CD1C     |          | -0.58457     |
| S100A8   |          | -0.49541     |
| ARL4C    |          | -0.45673     |
| CD1E     |          | -0.45583     |
| PELI1    |          | -0.45136     |
| CD37     |          | -0.41115     |
| P2RY14   |          | -0.39989     |
| FCGR2B   |          | -0.3858      |
| S100A9   |          | -0.3754      |
| MIS18BP1 |          | -0.32902     |
| CDC42EP3 |          | -0.30859     |
| RARA     |          | -0.29338     |
| CFP      |          | -0.2902      |
| SMAP2    |          | -0.27636     |
| SGMS2    |          | -0.26652     |
| FAU      |          | -0.2664      |
| SYTL3    |          | -0.699031703 |
| HEY1     |          | -0.690950857 |
| ALOX5    |          | -0.626058115 |
| HIST1H4C |          | -0.614398217 |
| IL18R1   |          | -0.542413854 |
| FDX1     |          | -0.527721614 |
| SLC26A2  |          | -0.523033479 |
| PIK3R1   |          | -0.490920489 |
| IKZF1    |          | -0.48783925  |
| CPEB4    |          | -0.484688691 |
| ABCA1    |          | -0.468609522 |
| ITK      |          | -0.468166253 |
| STK4     |          | -0.463940491 |
| AHNAK    |          | -0.441616235 |
| DUSP4    |          | -0.436323587 |
| IL1RL1   |          | -0.420305371 |
| VPS37B   |          | -0.406363102 |
| JARID2   |          | -0.389781444 |
| MAN2A1   |          | -0.378559635 |
| LRRFIP1  |          | -0.352698882 |
| MAPK1    |          | -0.326285518 |
| HERC1    |          | -0.321932907 |
| FYN      |          | -0.317851929 |
| FAM102B  |          | -0.312575071 |



Supplementary Table 2

|           |          |
|-----------|----------|
| CAV1      | -1.04784 |
| ADAMTS6   | -1.01894 |
| NFATC2    | -0.72301 |
| TCTN3     | -0.70816 |
| SCN3A     | -0.54455 |
| CALM1     | -0.54427 |
| PLPP1     | -0.5122  |
| ARHGAP10  | -0.51197 |
| GUCY1A1   | -0.49014 |
| CELF2     | -0.45569 |
| GABARAPL2 | -0.3666  |
| HINT1     | -0.35967 |
| TUBA1A    | -3.73683 |
| TUBB2B    | -3.25627 |
| STMN2     | -2.90726 |
| RBP1      | -2.64275 |
| HOXB5     | -2.60621 |
| MLLT11    | -2.24695 |
| GAP43     | -2.24496 |
| DCX       | -2.2171  |
| MAP1B     | -2.20634 |
| RTN1      | -2.128   |
| BEX1      | -2.07028 |
| HOTAIRM1  | -1.96144 |
| JPT1      | -1.94581 |
| UCHL1     | -1.88067 |
| NREP      | -1.79246 |
| GNG3      | -1.75608 |
| NEFL      | -1.75137 |
| BEX2      | -1.71223 |
| BEX3      | -1.67834 |
| NSG1      | -1.67748 |
| LINC02381 | -1.61979 |
| TAGLN3    | -1.58756 |
| TCEAL7    | -1.56335 |
| LAMP5     | -1.51583 |
| NEFM      | -1.49855 |
| SCG5      | -1.45784 |
| KIF5C     | -1.43897 |
| C4orf48   | -1.40574 |
| ZFH3      | -1.38517 |
| SOX11     | -1.38513 |
| SNCG      | -1.3714  |
| HOXA5     | -1.3391  |
| STMN4     | -1.32065 |
| TMSB15A   | -1.28789 |
| MDK       | -1.27723 |
| CRMP1     | -1.22141 |
| SST       | -1.21481 |
| PAFAH1B3  | -1.20885 |
| FXVD6     | -1.20113 |
| VAMP2     | -1.18005 |
| HOXB8     | -1.16459 |
| INA       | -1.16248 |
| CCNI      | -1.14434 |
| ELAVL4    | -1.13919 |
| ATP6V0B   | -1.1325  |
| POU2F2    | -1.12679 |
| CRABP1    | -1.11066 |
| CENPV     | -1.10941 |
| NCAM1     | -1.09197 |
| HOXB2     | -1.08041 |
| YBX1      | -1.04755 |
| FEZ1      | -1.03924 |
| CNIH2     | -1.03864 |
| APLP1     | -1.02574 |
| ZNF428    | -1.01801 |
| OLFM1     | -1.0138  |
| MAP1LC3A  | -0.98545 |

Supplementary Table 2

|        |              |
|--------|--------------|
| TTC3   | -0.94984     |
| HOXC4  | -0.94588     |
| PKIA   | -0.93618     |
| SVBP   | -0.92974     |
| UBE2E3 | -0.92035     |
| PFN2   | -0.89671     |
| RBFOX2 | -0.879       |
| NBDY   | -0.87747     |
| CXXC5  | -0.82716     |
| MYL6B  | -0.82229     |
| YWHAQ  | -0.81009     |
| PSMB5  | -0.80279     |
| RPAIN  | -0.79811     |
| PHPT1  | -0.78173     |
| MAGED1 | -0.76154     |
| YWHAB  | -0.65876     |
| GNAS   | -0.60519     |
| NDUFC2 | -0.57445     |
| PSMA7  | -0.56248     |
| H3F3A  | -0.53049     |
| SUMO2  | -0.51854     |
| CFL1   | -0.41907     |
| CD24   | -0.38941     |
| GPNMB  | -0.684110075 |
| SORBS2 | -0.60254962  |
| DCT    | -0.530983028 |
| ITGB1  | -0.37777787  |

**Supplementary Table 3:** Upregulated genes in one (717) or more cluster (244) in diabetic skin

| Genes upregulated in more than one cluster |          |          |          |          |          |          |          |           |            |          |          |             |
|--------------------------------------------|----------|----------|----------|----------|----------|----------|----------|-----------|------------|----------|----------|-------------|
| Gene name                                  | Endo     | T cells  | Fibro A  | Fibro B  | SMC      | NK cells | Kera A   | Myeloid   | Mast cells | LEC      | Kera B   | Melanocytes |
| NME2                                       | 0.547258 | 0.371458 | 0.340721 | 0.363589 | 0.418803 | 0.331886 | 0.450537 | 0.6064299 | 0.56595293 | 0.730945 | 1.094215 | 0.623357197 |
| RPS17                                      | 0.3867   | 0.320892 | 1.101562 | 0.602754 | 0.334645 | 0.304564 | 0.509315 | 0.4708534 | 0.84376286 |          | 0.765059 | 0.556808172 |
| RPS4Y1                                     | 0.703169 | 0.435065 | 1.174829 | 0.69737  | 0.585449 |          | 1.084121 | 0.5619834 | 0.41518773 | 0.396801 | 0.80169  |             |
| HLA-C                                      | 0.378065 | 0.498066 |          | 0.527427 | 0.448201 |          |          | 0.5733192 | 0.42208544 | 0.564683 | 0.97714  | 0.874216762 |
| MIF                                        |          | 0.324424 | 0.42757  | 0.457057 | 0.437317 | 0.295345 |          | 0.5113932 | 0.40276355 |          | 1.623008 | 0.704981498 |
| MT-ND3                                     | 0.37092  | 0.336789 |          |          | 0.546428 | 0.251835 | 0.374305 | 0.2582309 | 0.3412849  | 0.466307 |          |             |
| HLA-A                                      |          | 0.484634 |          | 0.384055 |          | 0.337589 |          | 0.5563169 |            | 0.478607 | 0.583014 | 0.595157841 |
| DDX3Y                                      |          | 0.395287 | 0.271111 | 0.302641 |          |          | 0.934603 | 0.4582154 |            | 0.328329 | 0.368335 |             |
| RPL23                                      | 0.431415 |          | 0.86344  | 0.560244 | 0.320165 |          | 0.341373 |           | 0.36003773 |          | 0.301384 |             |
| RPS20                                      | 0.298897 | 0.310132 | 1.274441 | 0.716998 |          | 0.314092 |          | 0.2527761 | 0.56255778 |          |          |             |
| RBM3                                       | 0.299571 |          | 0.503899 | 0.390994 | 0.365508 | 0.250225 | 0.275376 | 0.283415  |            |          |          |             |
| RPS29                                      | 0.331461 |          | 0.746293 | 0.445427 |          |          | 0.476095 |           | 0.33143794 |          | 0.592135 |             |
| IRF1                                       |          | 0.336207 | 0.534242 | 0.527859 |          | 0.352049 | 0.422992 |           |            |          | 0.793662 |             |
| RPL37                                      | 0.323441 |          | 0.671545 | 0.443982 |          |          | 0.2677   |           | 0.34457422 |          | 0.625977 |             |
| RPL27A                                     | 0.43805  |          | 0.478707 | 0.350349 |          |          | 0.366489 |           | 0.27057321 |          | 0.541549 |             |
| RPL21                                      | 0.258341 |          | 0.579715 | 0.323685 |          |          |          |           | 0.49470926 |          | 0.345427 |             |
| RPL38                                      |          |          | 0.698942 | 0.420935 |          |          | 0.396723 |           | 0.30367766 |          | 0.419501 |             |
| TPT1                                       | 0.3115   |          | 0.587283 | 0.333613 |          |          |          |           | 0.37142071 |          | 0.433872 |             |
| RPL37A                                     | 0.262739 |          | 0.669676 | 0.381003 |          |          | 0.273572 |           |            |          | 0.495042 |             |
| CXCL2                                      | 0.679417 |          | 0.70651  | 0.957998 |          |          |          | 0.3073845 |            | 0.658737 |          |             |
| IER3                                       | 0.342594 |          |          | 0.980697 | 0.352337 |          | 0.275186 |           |            |          | 1.263731 |             |
| RPS11                                      | 0.39486  |          | 0.70314  | 0.482959 |          |          | 0.358009 |           | 0.3774103  |          |          |             |
| RPS27                                      | 0.251796 |          | 0.604392 | 0.397959 |          |          |          |           | 0.34503906 |          | 0.577146 |             |
| RPS6                                       | 0.316809 |          | 0.699359 | 0.452469 |          |          |          |           | 0.47683545 |          | 0.320883 |             |
| IFITM1                                     |          | 0.702658 |          |          | 0.288515 | 0.481955 |          |           |            |          | 0.753352 | 0.578707739 |
| RPL13A                                     | 0.275171 |          | 1.033401 | 0.571162 |          |          | 0.319765 |           | 0.53549743 |          |          |             |
| SNHG8                                      |          |          | 0.337829 | 0.331813 |          |          | 0.350569 |           | 0.26660765 |          | 0.728808 |             |
| PTGS2                                      | 0.422843 |          | 0.254272 |          |          |          |          | 0.5086329 | 0.47199476 |          |          |             |
| NAMPT                                      |          | 0.348548 | 0.388493 | 0.27208  |          |          |          |           |            |          | 0.694073 |             |
| RPL23A                                     |          |          | 0.491178 | 0.272827 |          |          |          |           | 0.26729174 |          | 0.427923 |             |
| ATF3                                       |          |          | 0.363299 | 0.6115   |          |          | 0.531845 |           |            |          | 1.291956 |             |
| CXCL3                                      | 0.51931  |          | 0.62596  | 0.50244  |          |          |          | 0.331792  |            |          |          |             |
| NFKBIZ                                     |          | 0.364658 | 0.489932 | 0.5061   |          |          |          |           |            |          | 0.527129 |             |
| RPS25                                      |          |          | 0.531156 | 0.310336 |          |          |          |           | 0.30070986 |          | 0.399008 |             |
| BHLHE40                                    |          | 0.338586 |          | 0.272905 |          |          | 0.410202 |           |            |          | 0.766516 |             |
| EML4                                       |          | 0.305545 |          |          |          | 0.353217 | 0.282952 |           |            |          | 0.432537 |             |
| SLC2A3                                     |          | 0.558417 |          | 0.453869 |          | 0.303038 |          | 0.2962175 |            |          |          |             |
| RPS2                                       | 0.26518  |          | 0.857408 | 0.462609 |          |          |          |           | 0.26783415 |          |          |             |
| ETV6                                       |          | 0.317364 |          |          |          |          |          | 0.2585767 |            | 0.386445 | 0.592726 |             |
| SOD2                                       |          |          | 0.384681 | 0.507807 |          |          |          | 0.3138256 |            |          | 1.157378 |             |
| TAGLN                                      | 0.807621 |          |          | 0.740199 | 0.504397 |          | 0.340915 |           |            |          |          |             |
| RPS14                                      | 0.306783 |          | 0.538675 | 0.369955 |          |          |          |           | 0.3453059  |          |          |             |
| RPL34                                      |          |          | 0.389567 | 0.280926 |          |          |          |           | 0.25143096 |          | 0.267645 |             |
| RPLP2                                      |          |          | 0.734354 | 0.317802 |          |          |          |           | 0.34491503 |          | 0.375578 |             |
| HLA-E                                      |          |          |          | 0.424987 |          |          | 0.27148  | 0.2637002 |            |          | 0.586215 |             |
| IFI16                                      |          |          | 0.337891 |          |          |          | 0.263973 |           | 0.50000352 |          | 0.509849 |             |
| LDLR                                       |          |          | 0.437886 | 0.456628 |          |          | 0.324238 |           |            |          |          |             |
| RPL17                                      |          |          | 0.32456  |          |          |          |          |           | 0.465309   |          | 0.799049 |             |
| COL4A2                                     |          |          | 0.253665 | 0.530039 | 0.478362 |          |          |           |            |          |          |             |
| RPL7                                       |          |          | 0.791679 | 0.561236 |          |          |          |           | 0.31577267 |          |          |             |
| NAP1L1                                     |          |          | 0.252867 | 0.275305 |          |          |          |           | 0.42463917 |          |          |             |
| RPL10A                                     |          |          | 0.508807 | 0.351754 |          |          |          |           | 0.3538282  |          |          |             |
| CD44                                       |          |          |          |          | 0.269347 |          | 0.319974 |           |            |          | 0.78241  |             |
| ARL5B                                      |          | 0.336951 |          |          |          |          | 0.386872 | 0.3554569 |            |          |          |             |
| RPL35                                      |          |          | 0.517336 | 0.266194 |          |          |          |           |            |          | 0.363259 |             |
| RPSA                                       |          |          | 0.57613  | 0.28499  |          |          |          |           | 0.31555735 |          |          |             |
| RPL8                                       |          |          | 0.55653  | 0.292155 |          |          |          |           |            |          |          | 0.413216758 |
| HSPB6                                      |          |          | 0.672439 | 0.312341 | 0.303763 |          |          |           |            |          |          |             |
| RPL19                                      |          |          | 0.409251 | 0.250473 |          |          |          |           |            |          | 0.296089 |             |
| CREM                                       |          | 0.447252 |          |          |          |          |          | 0.3770373 | 0.45069937 |          |          |             |
| NOP53                                      |          |          | 0.431115 | 0.275035 |          |          |          |           |            |          | 0.383433 |             |
| RPL31                                      |          |          | 0.747204 | 0.383637 |          |          |          |           | 0.37556957 |          |          |             |
| RHOH                                       |          | 0.337693 |          |          |          | 0.276707 |          |           |            |          | 0.386867 |             |
| RPS18                                      |          |          | 0.56113  | 0.290567 |          |          |          |           |            |          | 0.396979 |             |
| SERPINB1                                   |          |          |          |          |          | 0.332377 |          | 0.4010856 | 0.33426384 |          |          |             |
| ITGA4                                      |          | 0.504479 |          |          |          | 0.251078 |          |           |            |          | 0.292008 |             |
| NABP1                                      |          |          | 0.722073 | 0.455759 |          |          | 0.328694 |           |            |          |          |             |

Supplementary Table 3

|            |          |          |          |          |           |            |             |
|------------|----------|----------|----------|----------|-----------|------------|-------------|
| GZMA       | 0.897744 |          |          | 0.535586 |           |            | 1.005085    |
| PLAU       |          | 0.394493 | 0.65853  | 0.313711 |           |            |             |
| UBA52      |          | 0.472994 | 0.276849 |          |           |            | 0.410045    |
| PTPN22     | 0.27491  |          |          | 0.336918 |           |            | 0.278387    |
| MT-ATP6    | 0.275827 |          |          | 0.411076 | 0.361411  |            |             |
| EIF1AY     |          |          |          |          | 0.288129  | 0.289001   | 0.28376     |
| RPL39      |          | 0.616353 | 0.345179 |          |           |            | 0.446785    |
| MYL9       | 0.329095 |          | 0.262138 | 0.329908 |           |            |             |
| REL        | 0.436042 |          |          | 0.36065  | 0.572132  |            |             |
| PTX3       |          | 1.651101 | 1.499872 |          |           | 0.919685   |             |
| LDHA       |          |          |          |          | 0.364783  | 0.2641583  | 1.537097    |
| VMP1       | 0.342952 |          |          |          | 0.3119368 | 0.256952   |             |
| CHCHD10    |          | 0.293929 |          |          | 0.272511  |            | 0.982745    |
| RPL13      |          | 0.541552 | 0.287425 |          |           | 0.28618076 |             |
| RNASEK     |          |          |          |          |           | 0.42043937 | 0.350011    |
| NNMT       |          | 0.507078 | 0.412303 |          |           |            | 0.377083    |
| NFKBIA     |          |          | 0.38601  |          | 0.641001  |            | 0.905982    |
| ACTN1      | 0.367638 |          |          | 0.409057 | 0.363334  |            |             |
| RPS12      |          | 0.376859 | 0.27668  |          |           |            | 0.297525    |
| RPL3       | 0.318354 | 0.272569 |          |          |           |            | 0.273176    |
| JUND       |          |          |          | 0.257835 | 0.547616  |            | 0.467872    |
| PNRC1      |          | 0.280984 | 0.408034 |          |           |            | 0.692512    |
| NR4A2      | 0.461788 |          |          | 0.30024  |           |            | 0.5413      |
| PSME1      | 0.291917 |          |          |          |           | 0.32598938 | 0.372933    |
| RPLP1      |          | 0.448969 | 0.334658 |          |           |            | 0.384178    |
| POSTN      | 0.40625  |          |          | 1.438816 | 0.802632  |            |             |
| SAMSN1     | 0.465959 |          |          | 0.293526 |           |            | 0.507746    |
| IGFBP4     |          | 0.485642 | 0.313848 |          |           | 0.497847   |             |
| CTSL       |          | 0.544402 | 0.360061 |          |           | 0.3782209  |             |
| RPL14      |          | 0.456347 | 0.276712 |          |           |            | 0.303823    |
| SPOCK1     |          | 0.276063 | 0.495204 |          |           |            |             |
| NDUFA13    |          |          |          |          |           | 0.31425909 | 0.573849    |
| VGLL3      |          |          | 0.481054 | 0.423996 |           |            |             |
| A2M        |          |          |          | 0.256286 |           | 0.4303081  |             |
| AC013394.1 |          |          |          |          | 0.255506  |            | 0.490509    |
| ADAMTS4    |          | 0.390886 |          |          | 0.293001  |            |             |
| RPS3A      |          | 0.368547 | 0.264685 |          |           |            |             |
| JUN        |          |          |          |          | 0.330505  |            | 0.41144     |
| AEBP1      |          |          |          | 0.302246 |           | 0.340027   |             |
| RPS8       |          | 0.540369 | 0.333604 |          |           |            |             |
| PPP1R15A   |          |          | 0.348592 |          | 0.316006  |            |             |
| VCL        | 0.253096 |          |          | 0.351652 |           |            |             |
| CCNL1      |          |          |          |          | 0.262115  |            | 0.423104    |
| CLEC2B     | 0.495874 |          |          |          |           |            | 0.614586    |
| PRDX1      |          |          |          |          |           | 0.3296437  | 0.330863    |
| CYTOR      |          | 0.393616 | 0.540826 |          |           |            |             |
| SLMAP      |          |          |          | 0.348139 | 0.277009  |            |             |
| IGF1       |          | 0.630271 | 0.61299  |          |           |            |             |
| GBP5       | 0.364517 |          |          |          | 0.336078  |            |             |
| PDCD4      |          |          |          |          | 0.267624  |            | 0.885823    |
| RPL24      |          | 0.361126 | 0.260698 |          |           |            |             |
| STK17A     | 0.271381 |          |          |          |           |            | 0.400868    |
| GPR183     | 0.320569 |          |          |          | 0.396337  |            |             |
| JUNB       |          |          | 0.325956 |          |           |            | 0.726252    |
| RPL18      |          | 0.499374 | 0.27386  |          |           |            |             |
| TRAF1      | 0.309719 |          |          |          | 0.31794   |            |             |
| KLF2       | 0.334431 |          |          | 0.2857   |           |            |             |
| WISP2      |          | 0.324839 |          | 0.495733 |           |            |             |
| GZMK       | 0.939808 |          |          |          | 0.739561  |            |             |
| TM4SF1     |          |          |          | 0.411118 |           |            | 0.665745    |
| THBS1      | 0.275996 |          | 0.288923 |          |           |            |             |
| NPC2       |          | 0.305122 |          |          | 0.4620318 |            |             |
| FOS        |          |          | 0.345056 |          |           |            | 0.702445    |
| RPL18A     |          | 0.500667 | 0.268323 |          |           |            |             |
| MYCBP2     |          | 0.296078 |          | 0.258893 |           |            |             |
| PDIA3      |          |          |          |          | 0.401891  | 0.30815955 |             |
| RPL36      |          | 0.546304 |          |          |           |            | 0.359688    |
| LAP3       |          |          |          |          | 0.4306416 |            | 0.380079    |
| CYBA       |          |          |          |          | 0.3556592 |            | 0.469762734 |
| PSMB9      |          |          |          | 0.307234 |           |            | 0.361761    |

Supplementary Table 3

|           |          |          |          |          |            |            |             |
|-----------|----------|----------|----------|----------|------------|------------|-------------|
| PFN1      | 0.272738 |          |          | 0.345763 |            |            |             |
| EHF       |          |          |          | 0.474491 |            |            | 0.518376    |
| HLA-DPA1  |          |          |          | 0.328866 |            |            | 0.410757    |
| COL4A1    |          | 0.279346 | 0.455606 |          |            |            |             |
| RPLP0     |          | 0.683061 | 0.464984 |          |            |            |             |
| RPS15     |          | 0.263445 |          |          |            |            | 0.33028     |
| CCL5      | 0.561283 |          |          |          |            |            | 0.621615    |
| C11orf96  | 0.277611 |          | 0.706518 |          |            |            |             |
| TC2N      | 0.319878 |          |          |          |            |            | 0.419653    |
| CTSC      |          |          | 0.279138 |          | 0.5484772  |            |             |
| EIF3E     |          | 0.374512 | 0.26759  |          |            |            |             |
| TNFAIP2   |          | 0.851235 | 0.718327 |          |            |            |             |
| GMFG      |          |          |          |          |            |            | 0.324652    |
| IFNG      | 0.839134 |          |          | 0.289834 |            |            | 0.837565566 |
| GBP1      |          |          | 0.300263 |          | 0.4085794  |            |             |
| ACTA2     |          |          | 0.300453 | 0.532373 |            |            |             |
| CSRP1     |          |          |          | 0.548255 |            |            | 0.798639    |
| RPL32     |          | 0.415709 | 0.295845 |          |            |            |             |
| ARID5B    |          |          | 0.27048  |          | 0.333978   |            |             |
| CNN2      |          | 0.275073 | 0.279846 |          |            |            |             |
| ADM       |          | 0.406561 | 0.644805 |          |            |            |             |
| STAT3     | 0.259635 |          |          |          |            |            | 0.416988    |
| ROMO1     |          |          |          |          | 0.33996868 |            | 0.660254    |
| HLA-DPB1  |          |          |          | 0.318478 |            |            | 0.287081    |
| MYLK      |          | 0.250545 |          | 0.374301 |            |            |             |
| RPS28     |          | 0.360071 |          |          |            |            | 0.520279    |
| CD59      |          |          |          |          | 0.3292268  |            | 0.522039    |
| SAT1      |          |          |          |          | 0.2628     |            | 0.777452    |
| CHD2      | 0.274143 |          |          |          | 0.368611   |            |             |
| TMEM176B  |          |          |          |          | 0.3413587  | 0.55228924 |             |
| TGFBR3    |          |          |          |          |            |            | 0.401072    |
| INSIG1    |          | 0.41338  | 0.396899 |          |            |            | 0.324872    |
| RPL9      |          | 0.467529 |          |          |            | 0.27614554 |             |
| LTB       | 0.756876 |          |          | 0.425952 |            |            |             |
| HEBP2     |          | 0.279315 |          |          |            |            | 0.417105    |
| PSME2     |          |          |          | 0.291203 | 0.3263267  |            |             |
| BICDL1    | 0.422531 |          |          | 0.334875 |            |            |             |
| RPS16     |          | 0.683385 | 0.452265 |          |            |            |             |
| GADD45B   |          |          |          | 0.532568 |            |            | 1.366078    |
| TNFAIP8   |          |          |          |          | 0.3365882  |            | 0.59883     |
| BCL2A1    | 0.308391 |          |          |          | 0.4275594  |            |             |
| CAV2      | 0.274651 |          |          | 0.296048 |            |            |             |
| SRPX      |          | 0.408348 | 0.269481 |          |            |            |             |
| SFRP1     |          |          | 0.557206 |          |            |            | 1.226404    |
| RNF213    | 0.337043 |          |          | 0.263026 |            |            |             |
| SVEP1     |          | 0.916465 | 0.86663  |          |            |            |             |
| WSB1      |          |          |          |          | 0.363833   |            | 0.415543    |
| CD3D      | 0.299257 |          |          | 0.390531 |            |            |             |
| GPRIN3    | 0.310183 |          |          | 0.289713 |            |            |             |
| SERPINE1  | 0.371671 |          | 0.492716 |          |            |            |             |
| ACTN4     | 0.29228  |          |          |          |            |            | 0.366836    |
| KRT14     | 0.268832 |          |          | 0.502033 |            |            |             |
| CALD1     | 0.562582 |          |          |          | 0.254955   |            |             |
| HIF1A     |          |          | 0.375585 |          |            |            | 0.631932    |
| RPL12     |          | 0.526198 | 0.30719  |          |            |            |             |
| COX7B     |          |          |          |          |            | 0.27791528 | 0.722407    |
| PARP14    |          |          |          | 0.316424 |            |            | 0.359175    |
| BTF3      |          | 0.262837 | 0.256902 |          |            |            |             |
| GADD45A   |          |          | 0.409258 |          | 0.48649    |            |             |
| CST7      | 0.519616 |          |          |          |            | 0.30082726 |             |
| NFKB1     | 0.26643  |          |          |          |            |            | 0.409123    |
| RPL35A    |          | 0.33898  | 0.254596 |          |            |            |             |
| ACKR4     |          | 0.257395 | 0.484332 |          |            |            |             |
| ICAM1     |          | 0.336523 |          |          |            | 0.3166565  |             |
| CA2       |          |          |          |          | 0.485681   |            | 0.601311    |
| DHRS3     |          | 0.309625 | 0.460217 |          |            |            |             |
| RASGRP1   | 0.388064 |          |          | 0.335621 |            |            |             |
| LINC00861 | 0.526087 |          |          | 0.290645 |            |            |             |
| IER2      |          |          |          | 0.407373 |            |            | 0.584492    |
| CCL14     | 0.425375 |          |          |          |            | 0.823013   |             |

Supplementary Table 3

|                                  |          |          |          |          |          |          |          |           |            |          |          |             |  |
|----------------------------------|----------|----------|----------|----------|----------|----------|----------|-----------|------------|----------|----------|-------------|--|
| ADH1B                            |          | 0.406369 | 0.278142 |          |          |          |          |           |            |          |          |             |  |
| NKTR                             |          |          |          |          |          | 0.260651 |          |           |            | 0.368015 |          |             |  |
| TNC                              |          |          | 0.898797 | 0.500155 |          |          |          |           |            |          |          |             |  |
| PPIF                             |          |          |          |          |          |          |          | 0.3367992 |            |          |          | 0.372163    |  |
| MYDGF                            |          |          |          |          |          |          |          | 0.291494  | 0.33996122 |          |          |             |  |
| CXCL12                           | 0.462423 |          | 0.260863 |          |          |          |          |           |            |          |          |             |  |
| TIMP1                            | 0.269986 |          |          |          |          |          |          |           |            |          | 0.913106 |             |  |
| GPX3                             |          |          | 0.790299 | 0.262428 |          |          |          |           |            |          |          |             |  |
| CD36                             |          |          | 0.654819 |          |          |          |          | 0.374781  |            |          |          |             |  |
| IL32                             |          | 0.442842 |          |          |          | 0.322425 |          |           |            |          |          |             |  |
| C6orf48                          |          |          | 0.309802 | 0.308411 |          |          |          |           |            |          |          |             |  |
| NFE2L2                           |          | 0.409511 |          |          |          |          |          |           |            |          |          | 0.443756    |  |
| ID4                              |          |          |          | 0.526073 |          |          |          |           |            |          |          | 0.813289    |  |
| DDX21                            |          | 0.465893 |          |          |          | 0.370762 |          |           |            |          |          |             |  |
| CLSTN2                           |          |          | 0.29142  |          | 0.306228 |          |          |           |            |          |          |             |  |
| LYST                             |          |          |          |          |          | 0.360405 |          |           |            | 0.351299 |          |             |  |
| BIRC3                            |          |          |          |          |          | 0.294856 |          |           |            |          |          | 0.718774    |  |
| GZMM                             |          | 0.392151 |          |          |          |          |          |           |            |          |          | 0.349853    |  |
| RPS9                             |          |          | 0.272342 |          |          |          |          |           |            |          |          | 0.288411    |  |
| EIF4A3                           |          |          |          | 0.258956 |          |          | 0.274192 |           |            |          |          |             |  |
| SELENOP                          |          |          |          |          |          |          |          | 0.5706181 |            |          |          | 0.422864    |  |
| PCAT19                           | 0.361504 |          |          |          |          |          |          |           |            | 0.366629 |          |             |  |
| NINJ1                            |          |          |          |          |          |          |          | 0.3606283 |            |          |          | 0.606782    |  |
| TAPBP                            |          | 0.284843 |          |          |          |          |          |           |            |          |          | 0.345004    |  |
| EEF1A1                           |          |          | 0.300873 | 0.365649 |          |          |          |           |            |          |          |             |  |
| CLEC2D                           |          | 0.321342 |          |          |          | 0.371981 |          |           |            |          |          |             |  |
| RPL29                            |          |          | 0.528192 | 0.330467 |          |          |          |           |            |          |          |             |  |
| BRD2                             |          |          |          |          |          |          | 0.367719 |           |            |          |          | 0.439061    |  |
| GPC3                             |          |          | 0.471761 | 1.012248 |          |          |          |           |            |          |          |             |  |
| KRT15                            |          |          |          |          |          |          | 0.567353 |           |            |          |          | 0.84945     |  |
| PTPRC                            |          | 0.291106 |          |          |          | 0.252117 |          |           |            |          |          |             |  |
| GAPDH                            |          |          |          |          | 0.318953 |          |          |           |            |          |          | 0.813968    |  |
| CD48                             |          |          |          |          |          |          |          |           | 0.31442918 |          |          | 0.323214    |  |
| LIMD2                            |          | 0.325097 |          |          |          | 0.309887 |          |           |            |          |          |             |  |
| RPS13                            |          |          | 0.376202 | 0.253051 |          |          |          |           |            |          |          |             |  |
| SFN                              |          |          |          |          | 0.275099 |          |          |           |            |          |          | 0.802554    |  |
| RPS5                             |          |          | 0.541218 | 0.343905 |          |          |          |           |            |          |          |             |  |
| Genes upregulated in one cluster |          |          |          |          |          |          |          |           |            |          |          |             |  |
| Gene name                        | Endo     | T cells  | Fibro A  | Fibro B  | SMC      | NK cells | Kera A   | Myeloid   | Mast cells | LEC      | Kera B   | Melanocytes |  |
| TCIM                             | 0.465767 |          |          |          |          |          |          |           |            |          |          |             |  |
| CPE                              | 0.436767 |          |          |          |          |          |          |           |            |          |          |             |  |
| CX3CL1                           | 0.393712 |          |          |          |          |          |          |           |            |          |          |             |  |
| MMRN1                            | 0.385103 |          |          |          |          |          |          |           |            |          |          |             |  |
| CTNNAL1                          | 0.328307 |          |          |          |          |          |          |           |            |          |          |             |  |
| HSPG2                            | 0.315073 |          |          |          |          |          |          |           |            |          |          |             |  |
| NUAK1                            | 0.313232 |          |          |          |          |          |          |           |            |          |          |             |  |
| PLS3                             | 0.310562 |          |          |          |          |          |          |           |            |          |          |             |  |
| STK38L                           | 0.28956  |          |          |          |          |          |          |           |            |          |          |             |  |
| CXCL8                            | 0.288281 |          |          |          |          |          |          |           |            |          |          |             |  |
| RAI14                            | 0.288279 |          |          |          |          |          |          |           |            |          |          |             |  |
| SLCO2A1                          | 0.286451 |          |          |          |          |          |          |           |            |          |          |             |  |
| SAMD4A                           | 0.268979 |          |          |          |          |          |          |           |            |          |          |             |  |
| YWHAH                            | 0.264533 |          |          |          |          |          |          |           |            |          |          |             |  |
| SMDT1                            | 0.264185 |          |          |          |          |          |          |           |            |          |          |             |  |
| RGPD2                            |          | 0.510405 |          |          |          |          |          |           |            |          |          |             |  |
| ICOS                             |          | 0.385625 |          |          |          |          |          |           |            |          |          |             |  |
| CTLA4                            |          | 0.383268 |          |          |          |          |          |           |            |          |          |             |  |
| JAK3                             |          | 0.365574 |          |          |          |          |          |           |            |          |          |             |  |
| GIMAP7                           |          | 0.360547 |          |          |          |          |          |           |            |          |          |             |  |
| SATB1                            |          | 0.341232 |          |          |          |          |          |           |            |          |          |             |  |
| AP3M2                            |          | 0.336155 |          |          |          |          |          |           |            |          |          |             |  |
| CD2                              |          | 0.296482 |          |          |          |          |          |           |            |          |          |             |  |
| ANKRD12                          |          | 0.289405 |          |          |          |          |          |           |            |          |          |             |  |
| USP36                            |          | 0.289386 |          |          |          |          |          |           |            |          |          |             |  |
| AC004687.1                       |          | 0.288034 |          |          |          |          |          |           |            |          |          |             |  |
| IL2RB                            |          | 0.281947 |          |          |          |          |          |           |            |          |          |             |  |
| P2RY8                            |          | 0.27314  |          |          |          |          |          |           |            |          |          |             |  |
| CHD1                             |          | 0.272356 |          |          |          |          |          |           |            |          |          |             |  |
| CD7                              |          | 0.27213  |          |          |          |          |          |           |            |          |          |             |  |
| ZC3H12D                          |          | 0.27161  |          |          |          |          |          |           |            |          |          |             |  |

Supplementary Table 3

|              |          |
|--------------|----------|
| UTY          | 0.269459 |
| SPOCK2       | 0.262779 |
| TAGAP        | 0.262534 |
| GPR65        | 0.258413 |
| RIPOR2       | 0.256638 |
| PDE4D        | 0.256082 |
| PDE3B        | 0.255277 |
| HNRNPA3      | 0.25395  |
| KDM6B        | 0.25197  |
| TNFAIP6      | 0.877525 |
| C7           | 0.791587 |
| CPXM1        | 0.712987 |
| MGST1        | 0.514455 |
| LPL          | 0.501426 |
| APOC1        | 0.482055 |
| DEPP1        | 0.454422 |
| RPL11        | 0.424697 |
| VCAM1        | 0.418938 |
| MTURN        | 0.394376 |
| RPL7A        | 0.380168 |
| AGTR1        | 0.37598  |
| RPL6         | 0.374854 |
| SMOC1        | 0.371412 |
| RPS3         | 0.355467 |
| IMPDH2       | 0.351149 |
| RPL4         | 0.349913 |
| EPB41L4A-AS1 | 0.348938 |
| EEF1B2       | 0.345334 |
| SNHG19       | 0.343044 |
| PLXNA4       | 0.34185  |
| RARRES2      | 0.329936 |
| RPL22        | 0.323292 |
| ALKAL2       | 0.321779 |
| PQLC2L       | 0.319932 |
| RPS24        | 0.318466 |
| APOL6        | 0.316065 |
| MAP7D3       | 0.314175 |
| RPS7         | 0.303037 |
| RBPMS        | 0.302562 |
| NACA         | 0.300366 |
| RPS15A       | 0.298825 |
| GOS2         | 0.288391 |
| EEF2         | 0.285902 |
| CPB1         | 0.283511 |
| ZFHx4        | 0.27295  |
| RPS27A       | 0.263828 |
| RPS23        | 0.263653 |
| PTGDS        | 0.257411 |
| FBL          | 0.255708 |
| TLN1         | 0.254251 |
| CDKN1C       | 0.251287 |
| COMP         | 1.447902 |
| LTBP2        | 0.655553 |
| GEM          | 0.543237 |
| SERPINE2     | 0.532598 |
| CDH11        | 0.522386 |
| COL12A1      | 0.514896 |
| EFEMP1       | 0.512167 |
| PLA2G2A      | 0.495771 |
| SMOC2        | 0.477769 |
| WTAP         | 0.476296 |
| PDLIM2       | 0.433081 |
| F3           | 0.421106 |
| LAMC1        | 0.406313 |
| COL8A1       | 0.399905 |
| TNNT3        | 0.39606  |
| MYOC         | 0.394293 |
| ABL2         | 0.384691 |
| GGT5         | 0.379511 |
| NFIB         | 0.379319 |

Supplementary Table 3

|           |          |
|-----------|----------|
| C3        | 0.354788 |
| CYGB      | 0.354622 |
| RARRES1   | 0.34104  |
| AMOTL2    | 0.339903 |
| ATP2B1    | 0.339349 |
| PDGFD     | 0.338747 |
| LRRC32    | 0.335232 |
| TMEM119   | 0.322778 |
| UGCG      | 0.318439 |
| ZFAS1     | 0.314725 |
| RGS16     | 0.314031 |
| SCARA3    | 0.313795 |
| MYL12A    | 0.310499 |
| NAV1      | 0.301395 |
| TNFRSF12A | 0.29945  |
| ZYX       | 0.296976 |
| COL18A1   | 0.294335 |
| PTGES     | 0.291212 |
| NTRK2     | 0.288353 |
| GPRC5B    | 0.284707 |
| MAFF      | 0.283525 |
| ATP5MC2   | 0.27328  |
| WNT11     | 0.27197  |
| TSHZ2     | 0.266991 |
| CRLF1     | 0.265112 |
| PRRX1     | 0.264371 |
| CMTM3     | 0.262849 |
| PPL       | 0.260844 |
| LSP1      | 0.2561   |
| GLIS3     | 0.255112 |
| RFLNB     | 0.252095 |
| PXDC1     | 0.251499 |
| ACTG2     | 0.632645 |
| COL6A1    | 0.625939 |
| PDLIM5    | 0.49334  |
| FGF7      | 0.490262 |
| SYNPO2    | 0.486753 |
| CNN1      | 0.448996 |
| FHL5      | 0.434962 |
| PRUNE2    | 0.425823 |
| SGIP1     | 0.423203 |
| MYH11     | 0.413502 |
| TPM2      | 0.35496  |
| LTBP1     | 0.341307 |
| CARMN     | 0.324451 |
| MACF1     | 0.322664 |
| PDLIM7    | 0.318012 |
| C12orf75  | 0.311507 |
| FLNA      | 0.311237 |
| IGFBP2    | 0.30698  |
| MBNL1-AS1 | 0.305196 |
| MYH9      | 0.298964 |
| MRVI1     | 0.285004 |
| TGFB111   | 0.284948 |
| CYFIP2    | 0.283232 |
| RTN4      | 0.283077 |
| SELENOM   | 0.282691 |
| KANK2     | 0.279914 |
| PELI2     | 0.275164 |
| CAVIN3    | 0.273091 |
| MT-ND5    | 0.271591 |
| EDIL3     | 0.27158  |
| ITGA1     | 0.268201 |
| LPP       | 0.264585 |
| BAG2      | 0.259004 |
| CAVIN1    | 0.258587 |
| CCDC3     | 0.258497 |
| SORBS1    | 0.258155 |
| FNBP1     | 0.256671 |
| YAP1      | 0.251955 |



Supplementary Table 3

|            |          |
|------------|----------|
| CRTAM      | 0.834386 |
| XCL1       | 0.571033 |
| COTL1      | 0.459571 |
| KLRG1      | 0.447474 |
| TIGIT      | 0.425214 |
| GZMH       | 0.400324 |
| HLA-DQB1   | 0.384285 |
| HLA-DQA1   | 0.364956 |
| CD8A       | 0.360668 |
| CORO1A     | 0.342673 |
| RNF19A     | 0.338507 |
| SH2D1A     | 0.325815 |
| APBB1IP    | 0.318829 |
| AC093010.2 | 0.31716  |
| PYHIN1     | 0.311271 |
| EVI2A      | 0.304879 |
| IKZF3      | 0.298219 |
| FYB1       | 0.294577 |
| NR4A3      | 0.292708 |
| LEPROTL1   | 0.281207 |
| TNFSF9     | 0.273999 |
| CD28       | 0.270644 |
| GPR174     | 0.269773 |
| ENC1       | 0.268165 |
| RBM25      | 0.265457 |
| CD3G       | 0.265418 |
| PNN        | 0.255125 |
| DTHD1      | 0.254007 |
| SLAMF7     | 0.250412 |
| FABP7      | 1.123206 |
| EGOT       | 0.727649 |
| PMAIP1     | 0.689865 |
| NSUN6      | 0.657849 |
| INTS6      | 0.639419 |
| CACNB4     | 0.638455 |
| SMG1       | 0.581258 |
| KRT6A      | 0.580473 |
| ARL4A      | 0.538373 |
| ZNF217     | 0.531921 |
| NEDD4L     | 0.517672 |
| LINC00842  | 0.491947 |
| GSDMC      | 0.465095 |
| AL355075.4 | 0.44885  |
| GABPB1-AS1 | 0.448614 |
| MALAT1     | 0.439545 |
| IRF6       | 0.439053 |
| EZH2       | 0.436119 |
| TSC22D2    | 0.416517 |
| TIAM1      | 0.405989 |
| SDCCAG8    | 0.397749 |
| AHCYL1     | 0.391278 |
| SEMA4A     | 0.385975 |
| SLC5A3     | 0.38486  |
| ARIH1      | 0.382903 |
| HNRNPU     | 0.381054 |
| FBXW7      | 0.379896 |
| ITGA2      | 0.379652 |
| DSC2       | 0.377179 |
| IDI1       | 0.376592 |
| CENPL      | 0.375005 |
| AC007952.4 | 0.371697 |
| IFRD1      | 0.369869 |
| TXNRD1     | 0.361263 |
| CXADR      | 0.36007  |
| MUCL1      | 0.358907 |
| SERPINB7   | 0.357405 |
| EIF4A1     | 0.354774 |
| EPHA2      | 0.351158 |
| ABI1       | 0.344765 |
| TRIM69     | 0.343214 |

Supplementary Table 3

|            |           |
|------------|-----------|
| DENND2C    | 0.34164   |
| PCF11      | 0.339796  |
| RND3       | 0.339632  |
| ERF        | 0.334248  |
| GOLGA4     | 0.331544  |
| MSN        | 0.330485  |
| MFHAS1     | 0.323394  |
| FAT1       | 0.321481  |
| ASXL1      | 0.320056  |
| SPPL3      | 0.319911  |
| GOLGA8A    | 0.319306  |
| TRA2B      | 0.319204  |
| NFAT5      | 0.317398  |
| PPP1R10    | 0.317366  |
| TRA2A      | 0.312161  |
| KDSR       | 0.311642  |
| SQSTM1     | 0.306498  |
| YME1L1     | 0.300408  |
| C3orf52    | 0.297495  |
| MRPS6      | 0.290138  |
| RB1CC1     | 0.2867    |
| TEAD1      | 0.282553  |
| POLR2A     | 0.282428  |
| MAP7D1     | 0.282098  |
| MED13L     | 0.281615  |
| SERTAD2    | 0.280575  |
| AC103591.3 | 0.279301  |
| TNFRSF19   | 0.279198  |
| ETFDH      | 0.278992  |
| IVNS1ABP   | 0.278546  |
| HCAR3      | 0.275554  |
| SMURF2     | 0.274444  |
| LUC7L3     | 0.274165  |
| GCH1       | 0.271938  |
| FUS        | 0.267854  |
| RRAGC      | 0.267809  |
| DENND4A    | 0.267687  |
| MORC3      | 0.266964  |
| PDK1       | 0.264906  |
| BAZ1A      | 0.261646  |
| TRAK1      | 0.25872   |
| SRSF3      | 0.258401  |
| WAC        | 0.258287  |
| NPIP5      | 0.257915  |
| RNF152     | 0.257876  |
| GOLGB1     | 0.25689   |
| ASH1L      | 0.255744  |
| PDGFC      | 0.253286  |
| SERBP1     | 0.251402  |
| CCL13      | 1.0271155 |
| FCGR3A     | 0.9967379 |
| C1QB       | 0.981146  |
| PLTP       | 0.9652652 |
| FCGBP      | 0.923438  |
| RNASE1     | 0.8606108 |
| F13A1      | 0.8142813 |
| IL1RN      | 0.7918724 |
| CCL3       | 0.7208858 |
| CD14       | 0.7110873 |
| CTSB       | 0.6923458 |
| CCL4       | 0.6630761 |
| CCL3L1     | 0.6542435 |
| CD209      | 0.5853251 |
| C1QA       | 0.5794059 |
| C1QC       | 0.5777074 |
| IL1B       | 0.5582776 |
| LYVE1      | 0.5385784 |
| CYBB       | 0.4997182 |
| MS4A4A     | 0.4843311 |
| ADAP2      | 0.4533922 |

Supplementary Table 3

|          |           |
|----------|-----------|
| PLAUR    | 0.4519404 |
| SELENOK  | 0.4448018 |
| CR1      | 0.4434102 |
| MARCO    | 0.4412016 |
| DAB2     | 0.4394293 |
| LGMN     | 0.4298652 |
| PDIA6    | 0.4215649 |
| IL4I1    | 0.4197466 |
| SLCO2B1  | 0.4117672 |
| CD163    | 0.4047885 |
| FCGR1A   | 0.3971001 |
| HSPA5    | 0.3967829 |
| HSP90B1  | 0.3958397 |
| FOLR2    | 0.3871713 |
| TTYH3    | 0.3869459 |
| PLEK     | 0.3785977 |
| CTS2     | 0.3676822 |
| SDF2L1   | 0.3672273 |
| FCN1     | 0.358587  |
| DRAM1    | 0.3564796 |
| CALR     | 0.3562618 |
| CD93     | 0.3562585 |
| LAIR1    | 0.3544952 |
| GK       | 0.3509853 |
| MAF      | 0.3488928 |
| CALM3    | 0.3471533 |
| C2       | 0.3391132 |
| CD63     | 0.3322926 |
| CREG1    | 0.3294829 |
| CLTC     | 0.3285133 |
| ITGB2    | 0.328256  |
| MANF     | 0.3264678 |
| PDIA4    | 0.3262193 |
| MSR1     | 0.3261597 |
| ARPC1B   | 0.3213751 |
| ADAM9    | 0.3210766 |
| PSAP     | 0.3201935 |
| AP1B1    | 0.3151074 |
| CYFIP1   | 0.3148346 |
| TMED9    | 0.3103978 |
| LAMP1    | 0.3094366 |
| BLVRB    | 0.3080406 |
| SNX6     | 0.307102  |
| PPIB     | 0.3069588 |
| MIR155HG | 0.3060885 |
| SLC15A3  | 0.3059907 |
| LILRB1   | 0.3052387 |
| ATF5     | 0.3023948 |
| MLEC     | 0.2990738 |
| FAM198B  | 0.2979074 |
| EGR2     | 0.2976487 |
| P4HB     | 0.2951027 |
| DSE      | 0.2945372 |
| GPR34    | 0.2904393 |
| CLTA     | 0.2890086 |
| IGSF6    | 0.2882757 |
| NAIP     | 0.2868225 |
| SPINT2   | 0.2864095 |
| CANX     | 0.2821009 |
| CD4      | 0.2818309 |
| KCTD12   | 0.2712132 |
| CCR1     | 0.2699262 |
| RPN2     | 0.2647181 |
| STAT1    | 0.2644078 |
| POMP     | 0.2634186 |
| SDC3     | 0.2601362 |
| FUCA1    | 0.2578886 |
| LRP1     | 0.2550853 |
| ITSN1    | 0.2550319 |
| LIPA     | 0.2548345 |

Supplementary Table 3

|            |           |            |
|------------|-----------|------------|
| ARPC4      | 0.2547623 |            |
| VAMP5      | 0.2536169 |            |
| GYPC       | 0.2531276 |            |
| SEC61G     | 0.2508338 |            |
| TIMP2      | 0.2503409 |            |
| ARPC2      | 0.2500729 |            |
| DHRS9      |           | 1.2391495  |
| ADCYAP1    |           | 0.96017336 |
| C5AR1      |           | 0.60105778 |
| PNPLA8     |           | 0.47046228 |
| SSR4       |           | 0.43223369 |
| SPATA13    |           | 0.39015575 |
| DDX18      |           | 0.37504674 |
| DUSP14     |           | 0.37182721 |
| TANK       |           | 0.36408041 |
| MS4A2      |           | 0.35875205 |
| HPGD       |           | 0.35799647 |
| IFITM2     |           | 0.35577776 |
| TMEM258    |           | 0.33058046 |
| SEC62      |           | 0.32655798 |
| SEC11C     |           | 0.32481094 |
| FKBP2      |           | 0.31681076 |
| NDUFA4     |           | 0.31548227 |
| SEC61B     |           | 0.31031637 |
| CTSG       |           | 0.29619282 |
| CD302      |           | 0.29340357 |
| PRR34-AS1  |           | 0.2586828  |
| TOP1       |           | 0.25809312 |
| FCER1G     |           | 0.25028101 |
| VWF        |           | 0.683534   |
| SEMA3A     |           | 0.66695    |
| RAPGEF5    |           | 0.656928   |
| DNASE1L3   |           | 0.630965   |
| KDR        |           | 0.575307   |
| STAB2      |           | 0.504015   |
| ENG        |           | 0.499729   |
| LYN        |           | 0.498182   |
| GJA1       |           | 0.474038   |
| MRC1       |           | 0.472698   |
| SRGAP3     |           | 0.461689   |
| NRP2       |           | 0.44626    |
| PLA2R1     |           | 0.441185   |
| C1R        |           | 0.420565   |
| TANC1      |           | 0.415232   |
| SLC27A3    |           | 0.412955   |
| WFS1       |           | 0.405794   |
| RNMT       |           | 0.393494   |
| HHEX       |           | 0.391266   |
| SELENON    |           | 0.389117   |
| MMP2       |           | 0.387063   |
| UNC5B      |           | 0.380685   |
| F8         |           | 0.376503   |
| SEMA6A     |           | 0.37641    |
| STAB1      |           | 0.376156   |
| OSBPL10    |           | 0.375962   |
| LAMB1      |           | 0.371436   |
| FLRT2      |           | 0.366284   |
| GATA2      |           | 0.357295   |
| SCN9A      |           | 0.353557   |
| TSPAN5     |           | 0.342621   |
| THBD       |           | 0.340269   |
| ROBO4      |           | 0.339534   |
| PIEZO2     |           | 0.339511   |
| SLC26A4    |           | 0.339393   |
| HRCT1      |           | 0.334577   |
| AC020916.1 |           | 0.332481   |
| FAM43A     |           | 0.328378   |
| PLSCR1     |           | 0.327718   |
| C17orf67   |           | 0.327078   |
| AHCTF1     |           | 0.326402   |

Supplementary Table 3

|          |          |
|----------|----------|
| TMEM255B | 0.322463 |
| ANKRD29  | 0.320182 |
| SHC1     | 0.319984 |
| PRR5L    | 0.318192 |
| KLHL3    | 0.311179 |
| GPR146   | 0.308527 |
| NPR1     | 0.303095 |
| RHOA     | 0.299152 |
| PLIN5    | 0.297235 |
| MFAP2    | 0.292658 |
| QSOX1    | 0.292233 |
| MCFD2    | 0.29115  |
| TXNL4B   | 0.289699 |
| IL7      | 0.285137 |
| SPTLC2   | 0.284392 |
| RALGAPA2 | 0.283335 |
| PDE7B    | 0.281847 |
| ETS2     | 0.278823 |
| RARRES3  | 0.278242 |
| CASP4    | 0.275003 |
| YTHDC2   | 0.273383 |
| CFI      | 0.273318 |
| TNRC6B   | 0.272653 |
| BCAT1    | 0.269073 |
| MMP14    | 0.267636 |
| CARD16   | 0.265131 |
| DDR2     | 0.26161  |
| TSPAN11  | 0.254784 |
| AQP5     | 1.697469 |
| AKR1C2   | 1.638407 |
| TPD52L1  | 1.181765 |
| PPP1R1B  | 1.161149 |
| FXYD3    | 1.160622 |
| S100A1   | 1.120962 |
| TESC     | 1.077989 |
| CA6      | 1.072322 |
| KRT19    | 1.045407 |
| SPTSSB   | 1.005262 |
| VAMP8    | 0.972985 |
| NDUFB1   | 0.964817 |
| ZG16B    | 0.939881 |
| S100A11  | 0.91309  |
| KRT18    | 0.900977 |
| SNORC    | 0.900841 |
| PDLIM4   | 0.900314 |
| KRT7     | 0.887937 |
| POLR2L   | 0.880846 |
| CLDN10   | 0.873833 |
| NDRG2    | 0.868332 |
| CEBPB    | 0.865683 |
| SLC12A2  | 0.862772 |
| RHOV     | 0.85969  |
| NDUFA1   | 0.781371 |
| ANAPC16  | 0.774329 |
| ALDH9A1  | 0.772797 |
| TMEM123  | 0.768317 |
| KRT8     | 0.758676 |
| STAC2    | 0.755513 |
| COX7A1   | 0.754076 |
| ELF3     | 0.751995 |
| SLC25A5  | 0.710218 |
| REXO2    | 0.702138 |
| COX5B    | 0.694464 |
| TSTD1    | 0.682516 |
| ADI1     | 0.678753 |
| TOMM7    | 0.667447 |
| NDUFC1   | 0.626678 |
| ENO1     | 0.624397 |
| CRACR2B  | 0.623329 |
| GCHFR    | 0.620646 |

Supplementary Table 3

|          |          |
|----------|----------|
| ROPN1B   | 0.61634  |
| ACTR3B   | 0.604301 |
| PALMD    | 0.599997 |
| CAST     | 0.598908 |
| FAM162A  | 0.592113 |
| SDCBP    | 0.590408 |
| PDE4B    | 0.572509 |
| UQCR11   | 0.562418 |
| SDHD     | 0.557871 |
| MTIF3    | 0.55695  |
| NDUFB4   | 0.550423 |
| ETHE1    | 0.550296 |
| NIPSNAP2 | 0.548197 |
| H2AFJ    | 0.540965 |
| ANKRD37  | 0.540241 |
| PPA1     | 0.538863 |
| GSTK1    | 0.533828 |
| CHPT1    | 0.522906 |
| UQCRQ    | 0.513964 |
| UGP2     | 0.508121 |
| ECHDC2   | 0.505171 |
| CMPK1    | 0.504991 |
| ARHGDIB  | 0.503094 |
| AES      | 0.501275 |
| GNG5     | 0.499631 |
| COX14    | 0.496154 |
| COX17    | 0.494857 |
| SMIM22   | 0.48548  |
| PIM3     | 0.485165 |
| OSTF1    | 0.482391 |
| BTG2     | 0.48111  |
| ATP5F1B  | 0.480267 |
| EEF1D    | 0.472095 |
| COX7C    | 0.469291 |
| CYSTM1   | 0.468357 |
| SH3YL1   | 0.46767  |
| ABHD5    | 0.465675 |
| GLS      | 0.464564 |
| WDR45B   | 0.464528 |
| ALDOA    | 0.460889 |
| TPD52    | 0.458181 |
| WASF2    | 0.458164 |
| CDC42SE2 | 0.455533 |
| PGK1     | 0.455175 |
| NDUFA3   | 0.454988 |
| COX6B1   | 0.453129 |
| DNAJC1   | 0.45205  |
| SPTSSA   | 0.45068  |
| DECR1    | 0.450119 |
| ARFGAP3  | 0.444157 |
| MKNK2    | 0.443384 |
| ETF1     | 0.441294 |
| NDUFB2   | 0.441199 |
| LMO4     | 0.440659 |
| TOMM20   | 0.440313 |
| ATP5MG   | 0.440205 |
| TMEM141  | 0.439445 |
| CEMIP2   | 0.43941  |
| PHB      | 0.438831 |
| HADHB    | 0.436345 |
| CNN3     | 0.435105 |
| CD46     | 0.432156 |
| UQCRB    | 0.429588 |
| SRRM1    | 0.425347 |
| PSMB8    | 0.42526  |
| TPI1     | 0.422865 |
| SSFA2    | 0.422631 |
| SYPL1    | 0.422098 |
| RORA     | 0.421573 |
| EZR      | 0.420509 |

Supplementary Table 3

|          |          |
|----------|----------|
| MBD2     | 0.419389 |
| VDAC1    | 0.419042 |
| IQGAP2   | 0.419033 |
| CIB1     | 0.416005 |
| CLIC1    | 0.415643 |
| ANP32B   | 0.414728 |
| RHOC     | 0.409709 |
| LITAF    | 0.409355 |
| NANS     | 0.409262 |
| ESRRA    | 0.409005 |
| SGK1     | 0.408992 |
| UBL5     | 0.408239 |
| ARHGAP18 | 0.407033 |
| SUCLA2   | 0.402934 |
| NUDT8    | 0.402921 |
| ANXA11   | 0.402378 |
| ATP5ME   | 0.400316 |
| HADHA    | 0.400026 |
| ANXA5    | 0.398151 |
| SMIM4    | 0.394784 |
| ISCU     | 0.392663 |
| PKM      | 0.388094 |
| COX8A    | 0.388078 |
| SYF2     | 0.387324 |
| UBALD2   | 0.386048 |
| WIPF1    | 0.385897 |
| GRPEL1   | 0.38589  |
| CD164    | 0.383805 |
| UBE2V1   | 0.383498 |
| ATP5MD   | 0.382701 |
| CFLAR    | 0.381894 |
| MAP2K3   | 0.381763 |
| SERP1    | 0.380266 |
| EIF3K    | 0.379847 |
| SRSF5    | 0.379297 |
| TMEM159  | 0.375304 |
| ATP5MF   | 0.374509 |
| STK39    | 0.368824 |
| SLC9A3R1 | 0.368065 |
| ZFP36L1  | 0.36505  |
| APOBEC3G | 0.361623 |
| CDC37    | 0.359247 |
| ID2      | 0.357712 |
| MAP3K8   | 0.357429 |
| PNP      | 0.356378 |
| ARID5A   | 0.35381  |
| CHMP4B   | 0.351181 |
| HLA-F    | 0.350443 |
| ANP32E   | 0.350346 |
| TUBA4A   | 0.347847 |
| PPP2R5A  | 0.345525 |
| NENF     | 0.345171 |
| RAB5A    | 0.343766 |
| NR3C1    | 0.33937  |
| TOMM5    | 0.337905 |
| STK17B   | 0.337529 |
| PPCS     | 0.337107 |
| HIPK1    | 0.335792 |
| RAP1A    | 0.335699 |
| COQ10B   | 0.334904 |
| UBE2B    | 0.330062 |
| COPS9    | 0.327904 |
| MCRIP2   | 0.32762  |
| UTRN     | 0.327469 |
| TMEM134  | 0.327162 |
| PRPSAP1  | 0.325956 |
| RPL36AL  | 0.323148 |
| DDT      | 0.322227 |
| NAA50    | 0.321778 |
| ZC3H12A  | 0.321262 |

Supplementary Table 3

|           |          |             |
|-----------|----------|-------------|
| PSMD9     | 0.321004 |             |
| IDH2      | 0.320882 |             |
| SLC39A8   | 0.318387 |             |
| PTPN7     | 0.317125 |             |
| PRPF4B    | 0.316998 |             |
| TMEM256   | 0.316744 |             |
| FGFR10P2  | 0.314529 |             |
| CYLD      | 0.310099 |             |
| RILPL2    | 0.308712 |             |
| RAB11FIP1 | 0.30852  |             |
| SP100     | 0.308195 |             |
| EIF2A     | 0.307811 |             |
| DBNL      | 0.304842 |             |
| ELF1      | 0.302678 |             |
| ARPC5L    | 0.301554 |             |
| MBP       | 0.301238 |             |
| IDH3B     | 0.30042  |             |
| JAK1      | 0.298506 |             |
| MTCH1     | 0.298415 |             |
| CSRNP1    | 0.298211 |             |
| SNX1      | 0.297778 |             |
| NARS      | 0.297377 |             |
| RPL30     | 0.29459  |             |
| STXBP3    | 0.293635 |             |
| RPA3      | 0.293081 |             |
| PPTC7     | 0.292554 |             |
| ICAM3     | 0.292407 |             |
| ARF6      | 0.291666 |             |
| PCNP      | 0.278957 |             |
| CYTH1     | 0.277775 |             |
| TMF1      | 0.277592 |             |
| SDHB      | 0.275804 |             |
| GLUD1     | 0.274941 |             |
| RICTOR    | 0.272747 |             |
| TGIF1     | 0.272536 |             |
| KRTCAP2   | 0.272294 |             |
| SUN2      | 0.271449 |             |
| HBP1      | 0.271284 |             |
| FBXW2     | 0.270081 |             |
| TMEM243   | 0.270012 |             |
| FOXP1     | 0.265435 |             |
| STAG2     | 0.264711 |             |
| SEPT1     | 0.264119 |             |
| GGCT      | 0.263442 |             |
| USP16     | 0.262964 |             |
| PRR13     | 0.259105 |             |
| DENR      | 0.258776 |             |
| YES1      | 0.258458 |             |
| TM9SF3    | 0.257826 |             |
| TOB2      | 0.254391 |             |
| CD2AP     | 0.25416  |             |
| ALOX5AP   | 0.25245  |             |
| CRYM      |          | 0.716624909 |
| FRZB      |          | 0.687743945 |
| MIA       |          | 0.615971774 |
| GNAL      |          | 0.508115225 |



**Supplementary Table 4:** Cluster specific bidirectional genes in diabetic skin

| Gene name  | downregulated |          |          |          |          |          |          |          |            |          |          |              |
|------------|---------------|----------|----------|----------|----------|----------|----------|----------|------------|----------|----------|--------------|
|            | upregulated   |          |          |          |          |          |          |          |            |          |          |              |
| Gene name  | Endo          | T cells  | Fibro A  | Fibro B  | SMC      | NK cells | Kera A   | Myeloid  | Mast cells | LEC      | Kera B   | Melanocytes  |
| HBB        |               | -1.28494 | -1.39067 | -0.2907  |          | -0.61282 | -0.56192 | -0.83243 | -0.63723   | 0.747558 | 1.168621 |              |
| CRIP1      |               |          | -0.54996 |          | 0.420117 | 0.277647 | -0.46562 |          | -0.69306   | -1.42702 | 0.667339 |              |
| HSPA1A     |               | -0.87964 | -0.49674 | -0.41027 | -0.63141 | -1.04821 |          | -0.87863 |            |          | 0.295021 |              |
| RPS26      | -0.386175133  | -0.53152 | 0.257108 |          |          | -0.64288 | -0.64307 | -0.54053 |            | -0.50426 |          |              |
| RHOB       | 0.355652103   |          | -0.56797 | -0.65146 | -0.32004 |          | -0.25513 | -0.60074 |            |          |          |              |
| SLC38A2    |               |          | -0.52039 | -0.38702 | -0.33484 |          | 0.260405 | -0.26639 |            |          | 0.383131 |              |
| HSPA1B     |               | -0.51482 |          | -0.33587 | -0.47612 | -0.61661 |          | -0.56837 |            |          | 0.373669 |              |
| ZFP36L2    |               | -0.29358 | -0.69967 |          |          | -0.25094 |          |          | -0.431     | -0.9819  | 0.414117 |              |
| CD9        |               |          | -0.82389 |          |          |          | -0.29616 | -0.26421 |            | -0.42745 | 0.792262 |              |
| CCL2       |               |          | 1.17144  | 1.7037   | -0.56007 |          | 1.094228 | 0.444704 |            |          |          |              |
| COL1A1     |               |          | -0.54629 | -0.88504 | 0.365683 |          | -0.75185 |          |            |          |          | -0.986448202 |
| COL1A2     |               |          | -0.47728 | -0.73993 | 0.435566 |          | -0.57827 |          |            |          |          | -0.958361919 |
| CDKN1A     |               |          | 0.281559 | 0.308844 | -0.38326 |          |          |          | -0.31856   |          | 0.439477 |              |
| LGALS3     |               | -0.27377 |          |          |          |          | -0.36308 | -0.25732 | -0.43604   |          | 1.022059 |              |
| MGP        | 0.948557549   |          | -1.08372 | -0.52398 |          |          | -0.4477  |          |            | -1.85774 |          |              |
| IFI27      | -0.680145371  |          | -0.66355 | -0.33996 | -1.0081  |          |          |          |            |          |          | 0.997085485  |
| CD74       |               | 0.303526 | -0.34686 |          |          | 0.468262 |          |          |            | 0.336557 | 0.531791 |              |
| S100A4     |               |          | -0.42485 |          | 0.277805 |          | -0.30746 |          |            |          | 0.551791 | -0.984496335 |
| SERF2      |               |          | -0.34481 | -0.41265 |          |          | -0.26999 |          |            | -0.3019  | 0.593808 |              |
| UBC        |               |          | -0.25354 | -0.27135 |          |          |          | -0.33506 | -0.43605   |          | 0.641359 |              |
| VIM        |               | -0.5036  |          | 0.259662 |          | -0.42242 |          |          | -0.73836   | -0.39564 |          |              |
| MT-ND1     | 0.380233022   |          |          |          | 0.524949 |          | 0.43646  | 0.282616 |            |          | -0.3993  |              |
| S100A6     |               |          | -0.39955 |          |          | -0.29038 | -0.55178 | -0.48704 |            |          | 1.230911 |              |
| EGR1       |               |          | 0.410435 | 0.439865 |          |          | -0.25813 |          | 0.338671   |          |          |              |
| RACK1      |               |          | 0.421725 | 0.322382 |          |          | -0.3689  |          |            |          | -0.3089  |              |
| ATP1A1     |               |          | -0.45563 | -0.30995 |          |          | 0.331089 |          |            |          | 0.635282 |              |
| TGFBI      |               |          | 0.280441 | 0.487724 | 0.75534  |          | -0.36505 |          |            |          |          |              |
| ACTB       |               |          |          |          | 0.425156 | 0.387227 |          | 0.410863 |            |          | -0.68268 |              |
| NEAT1      | 0.30616317    |          |          |          | 0.301384 |          | 0.428777 |          | -0.35999   |          |          |              |
| FOSB       |               |          |          | 0.470535 | -0.38863 |          |          |          | 0.286919   |          | 0.523372 |              |
| B2M        |               |          | -0.27126 |          |          |          |          | 0.26802  | 0.42801    |          | 0.818047 |              |
| CYR61      | 0.416500745   |          | 0.283486 | 0.458588 | -0.34255 |          |          |          |            |          |          |              |
| FN1        | 0.880840823   |          | -0.67044 | -0.34619 | 0.652952 |          |          |          |            |          |          |              |
| IGFBP5     |               |          | -0.48423 | -0.49594 | 0.433817 |          |          |          |            | 1.174626 |          |              |
| TPM4       |               | 0.260728 | -0.28955 |          | 0.370445 |          |          | 0.315241 |            |          |          |              |
| CD81       |               |          |          | -0.31602 |          | 0.279959 | -0.36293 | 0.351604 |            |          |          |              |
| RPS21      |               | -0.25047 |          |          |          | -0.32775 |          |          |            | -0.29861 | 0.270481 |              |
| RPL41      |               |          |          |          |          | -0.30112 |          | -0.29991 |            | -0.27026 | 0.416271 |              |
| TNFSF10    |               | 0.275424 | -0.26384 |          |          |          |          |          | 0.407534   |          | 0.401981 |              |
| MT-ATP8    |               |          | -0.49943 | -0.5045  |          |          | 0.347836 |          |            |          |          | -0.618700628 |
| HLA-B      |               |          | -0.40424 |          |          |          |          | 0.285737 |            | 0.379249 | 0.615374 |              |
| DSTN       |               |          | -0.28878 |          |          | -0.48812 |          |          |            | -0.53746 | 0.486409 |              |
| RGCC       |               | 0.254525 | -0.54059 | -0.4552  |          |          |          |          |            |          | 0.639381 |              |
| FCGRT      | -0.3661142    |          | 0.274649 |          |          |          |          | 0.431419 |            |          |          |              |
| HLA-DRB1   | -0.268887258  |          | -0.39421 |          |          | 0.564876 |          |          | 0.28862    |          |          |              |
| RPL10      |               |          | 0.450716 |          |          |          | -0.2637  |          |            |          |          |              |
| TSPO       |               |          |          | -0.30842 |          |          | -0.49793 |          |            |          | 0.883512 |              |
| RGS1       |               | 0.253246 |          |          |          | 0.307516 |          | -0.29023 |            |          |          |              |
| ACTG1      |               |          |          | 0.328335 |          |          | -0.5561  |          |            |          | -1.01838 |              |
| CXCL14     |               |          | 0.475226 | 0.309929 |          |          | -0.29988 |          |            |          |          |              |
| LMNA       |               |          |          |          |          |          |          | -0.36642 | -0.56452   |          | 0.343693 |              |
| ZFP36      |               |          |          |          | -0.25495 |          | 0.350695 |          |            |          | 1.015175 |              |
| IER5       |               |          |          |          |          |          | 0.280215 | -0.38407 |            |          | 0.53026  |              |
| SOC3       |               |          | 0.26774  | 0.432238 | -0.29295 |          |          |          |            |          |          |              |
| AL078639.1 |               |          |          | -0.49302 |          |          | 0.301421 |          |            |          |          | -0.700200821 |
| ADIRF      |               |          | -0.55759 |          |          |          |          |          |            | -0.43361 | 1.240828 |              |
| APOE       |               |          |          | 0.921339 | -0.69079 |          | -0.26013 |          |            |          |          |              |
| FABP4      | -0.899479007  |          | 0.553558 |          | -0.54803 |          |          |          |            |          |          |              |
| DST        |               |          | -0.48966 | -0.2586  | 0.251433 |          |          |          |            |          |          |              |
| PPDPF      |               | -0.25631 |          |          |          |          |          | -0.28281 |            |          | 0.497682 |              |
| SLC25A6    |               |          | 0.554672 | 0.298902 |          |          | -0.31888 |          |            |          |          |              |
| FHL1       |               |          | -0.43854 | 0.284095 | 0.270989 |          |          |          |            |          |          |              |
| ACADVL     |               |          | -0.2887  | -0.27407 |          |          |          |          |            |          | 0.452645 |              |
| COL3A1     |               |          | -0.62791 | -0.77684 | 0.436466 |          |          |          |            |          |          |              |
| FOSL2      |               | 0.358867 |          |          | -0.25722 |          |          |          |            |          | 0.420112 |              |
| FTH1       |               |          | 0.263102 |          |          |          |          |          | -0.3799    |          | -0.77644 |              |

Supplementary Table 4

|          |              |          |          |          |          |          |          |          |              |
|----------|--------------|----------|----------|----------|----------|----------|----------|----------|--------------|
| FTL      |              | 0.406693 |          |          | -0.57751 |          |          |          | -0.86574     |
| PMP22    |              | -0.31513 |          |          |          | 0.35715  |          |          | -0.542383089 |
| MFAP4    |              | -0.67506 | -0.74644 | 0.28525  |          |          |          |          |              |
| MT-CYB   |              |          | -0.29975 | 0.319147 |          |          |          | -0.92989 |              |
| HES1     |              |          |          | -0.45288 | 0.567566 | -0.49025 |          |          |              |
| PPP1CB   |              | -0.26981 |          | -0.29323 |          |          |          | 0.536775 |              |
| DBI      |              |          |          |          | -0.61843 | -0.30682 |          | 1.125978 |              |
| STEAP4   |              | 0.377859 | 0.35973  | -0.54633 |          |          |          |          |              |
| MARCKS   |              |          | 0.401793 |          |          |          |          | -1.86256 |              |
| ATP1B3   | 0.3500497    |          |          |          |          | -0.9812  |          |          |              |
| COL6A2   |              | -0.36407 |          | 0.417905 |          |          |          |          |              |
| MT-ND2   |              |          |          | 0.267375 |          |          |          | -0.71679 |              |
| EDNRB    |              |          |          | -0.42195 |          |          | 0.471843 |          |              |
| COL14A1  |              | -0.49385 |          | 0.326446 |          |          |          |          |              |
| MT-CO2   |              |          |          | 0.293414 |          |          |          | -0.95864 |              |
| NRP1     | -0.272038011 |          |          |          |          | 0.433561 |          |          |              |
| SH3BGR1  |              | -0.2596  |          |          |          |          |          | 0.273215 |              |
| PRSS23   |              | -0.25613 |          |          |          |          | 0.437413 |          |              |
| APOD     | -0.440984293 |          | 0.378555 |          |          |          |          |          |              |
| HTRA1    |              | -0.38476 |          |          |          |          | 0.404273 |          |              |
| ADGRF5   | -0.296157677 |          |          |          |          |          | 0.522846 |          |              |
| IL1R1    |              |          | 0.309067 |          |          | -0.40439 |          |          |              |
| ITPR2    |              |          |          |          | -0.40976 |          |          | 0.440327 |              |
| ASPN     |              | -0.7738  | 0.272673 |          |          |          |          |          |              |
| FILIP1L  |              |          |          | 0.407718 |          | -0.79692 |          |          |              |
| PLPP3    |              | 0.341722 |          | -0.50252 |          |          |          |          |              |
| CLU      |              | -0.42419 | 0.370083 |          |          |          |          |          |              |
| RAMP1    |              |          |          | -0.30855 |          |          |          |          | 0.636094669  |
| PEG10    |              | 0.277338 |          |          |          |          |          | -1.04844 |              |
| AKR1C1   |              |          |          |          |          |          | -0.94769 | 1.414518 |              |
| NR4A1    |              | -0.37198 |          |          |          |          |          | 0.37388  |              |
| ATP5F1E  |              |          |          |          |          |          | -0.3499  | 0.429289 |              |
| ENAH     |              | -0.3535  |          | 0.358347 |          |          |          |          |              |
| TNFRSF9  |              |          |          |          | 0.335052 |          | -0.81356 |          |              |
| IRF2BP2  | 0.279172     | -0.32025 |          |          |          |          |          |          |              |
| APRT     |              |          |          |          | -0.27022 |          |          | 0.319141 |              |
| RNF144B  |              |          |          |          | 0.286666 | -0.3963  |          |          |              |
| SERPINH1 |              |          | -0.41476 |          |          |          | 0.269585 |          |              |
| IFITM3   |              |          |          | -0.32038 |          |          | 0.57183  |          |              |
| QPCT     |              |          | -0.29052 |          |          |          |          |          | 0.444015154  |
| MT-CO3   |              |          |          | 0.291011 |          |          |          | -0.63744 |              |
| TLE4     |              | -0.37247 |          |          | 0.351287 |          |          |          |              |
| CYTIP    |              |          |          |          |          | -0.2703  |          | 0.513388 |              |
| HP1BP3   |              | -0.33942 |          |          |          |          |          | 0.337175 |              |
| IL6      |              |          | 0.747003 | -0.28899 |          |          |          |          |              |
| RPL28    |              | 0.421199 |          |          | -0.26077 |          |          |          |              |
| TIPARP   |              |          |          | -0.36403 |          |          |          | 0.503945 |              |
| LMCD1    | -0.282175374 |          | 0.651942 |          |          |          |          |          |              |
| EIF1B    |              |          |          |          | 0.31709  |          |          | -0.9885  |              |
| CYP1B1   |              | -0.34327 | 0.311284 |          |          |          |          |          |              |
| COMT     |              |          |          |          | -0.28591 |          |          | 0.745562 |              |
| UCP2     |              |          |          |          |          | 0.256495 | -0.33832 |          |              |
| PERP     |              |          |          |          | -0.36608 |          |          | 0.707944 |              |
| MEIS2    |              |          |          |          |          |          | 0.265914 | -1.18068 |              |
| APP      |              |          |          |          |          |          | 0.364111 |          | -0.780847213 |
| PLD3     |              |          |          |          |          | 0.381662 |          | -0.85703 |              |
| RPL26    |              |          |          |          |          | -0.27884 |          | 0.381305 |              |
| MARCKSL1 |              | 0.278618 |          |          |          |          |          | -2.20196 |              |
| HLA-DRA  |              | -0.36384 |          |          | 0.332237 |          |          |          |              |
| EGFL7    | -0.322879751 |          |          |          |          | 0.2618   |          |          |              |
| NUPR1    |              | 0.282768 |          |          | -0.32391 |          |          |          |              |
| TUBB     |              |          | 0.311879 |          |          |          |          | -1.85037 |              |
| AQP1     |              | -0.52523 |          | 0.464365 |          |          |          |          |              |
| PPIA     |              |          |          |          |          |          | -0.30108 | 0.646813 |              |
| PROCR    |              |          | -0.33729 |          |          |          | 0.542605 |          |              |
| RCAN1    |              |          | 0.296847 |          |          |          | -0.74458 |          |              |
| TMEM238  |              |          |          |          | -0.28643 |          |          | 0.257238 |              |
| USP53    |              | -0.26676 |          |          |          |          | 0.261701 |          |              |
| NFIL3    |              | 0.302378 |          |          | -0.26669 |          |          |          |              |
| MBNL1    |              | -0.32889 |          |          |          |          |          | 0.496255 |              |

Supplementary Table 4

|         |              |          |          |          |          |          |          |
|---------|--------------|----------|----------|----------|----------|----------|----------|
| SDC4    |              |          |          |          | -0.46125 |          | 0.663007 |
| JMJD1C  |              | -0.32787 |          |          | 0.396796 |          |          |
| LDHB    |              |          |          |          |          | 0.330715 | -1.04008 |
| GPBP1   |              |          |          |          | 0.288949 | -0.26322 |          |
| CTSD    |              |          |          |          | -0.33666 | 0.260363 |          |
| CIRBP   |              | 0.258312 |          |          |          |          | -0.56413 |
| C1orf21 |              |          |          |          |          | -0.44271 | 0.392182 |
| BTG1    |              |          |          | -0.31579 | 0.438116 |          |          |
| LIFR    | -0.290134604 |          |          |          |          | 0.418976 |          |
| FAM129A |              | -0.3215  | 0.257248 |          |          |          |          |
| PDLIM3  |              | -0.28122 | 0.328647 |          |          |          |          |
| TCF4    |              | -0.37059 |          |          | 0.323596 |          |          |
| BASP1   |              |          | 0.568993 |          |          |          | -2.82542 |
| SPRY1   |              |          | -0.41292 |          |          | 0.415793 |          |
| CTGF    | 0.273627518  | -0.73301 |          |          |          |          |          |
| NCOA7   |              |          |          |          | -0.35777 |          | 0.609019 |

**Supplementary Table 5:** GSEA analysis showing upregulated and downregulated pathways using KEGG database in diabetic skin endothelial cells based on normalized enrichment score (NES)

| Name                                           | Size | Enrichment score | Normalized enrichment score | NOM p-val  | FDR q-val  | FWER p-val | RANK AT MAX | LEADING EDGE                    |
|------------------------------------------------|------|------------------|-----------------------------|------------|------------|------------|-------------|---------------------------------|
| <b>upregulated pathways</b>                    |      |                  |                             |            |            |            |             |                                 |
| KEGG_RIBOSOME                                  | 70   | 0.5963758        | 1.9677137                   | 0          | 0.00084848 | 0.001      | 416         | tags=71%, list=23%, signal=89%  |
| KEGG_FOCAL_ADHESION                            | 50   | 0.55508953       | 1.7097642                   | 0.00392157 | 0.03769462 | 0.073      | 274         | tags=42%, list=15%, signal=48%  |
| KEGG_P53_SIGNALING_PATHWAY                     | 16   | 0.7140249        | 1.6508062                   | 0.00340716 | 0.05656531 | 0.155      | 376         | tags=69%, list=21%, signal=86%  |
| KEGG_CHEMOKINE_SIGNALING_PATHWAY               | 31   | 0.5313045        | 1.471174                    | 0.04844961 | 0.28148794 | 0.698      | 307         | tags=39%, list=17%, signal=46%  |
| KEGG_REGULATION_OF_ACTIN_CYTOSKELETON          | 50   | 0.45575425       | 1.3873509                   | 0.04448743 | 0.43211228 | 0.894      | 151         | tags=24%, list=8%, signal=25%   |
| KEGG_CELL_CYCLE                                | 18   | 0.5599457        | 1.3585066                   | 0.09689214 | 0.43231717 | 0.936      | 421         | tags=56%, list=23%, signal=72%  |
| KEGG_ECM_RECEPTOR_INTERACTION                  | 16   | 0.5756831        | 1.3516417                   | 0.09756097 | 0.38852018 | 0.943      | 123         | tags=38%, list=7%, signal=40%   |
| KEGG_SMALL_CELL_LUNG_CANCER                    | 27   | 0.501508         | 1.3447993                   | 0.0967118  | 0.35399508 | 0.946      | 168         | tags=26%, list=9%, signal=28%   |
| KEGG_CYTOKINE_CYTOKINE_RECEPTOR_INTERACTION    | 25   | 0.5075006        | 1.3247643                   | 0.12222222 | 0.35443795 | 0.963      | 46          | tags=24%, list=3%, signal=24%   |
| KEGG_PARKINSONS_DISEASE                        | 33   | 0.46370274       | 1.2875072                   | 0.11568628 | 0.38972437 | 0.98       | 360         | tags=42%, list=20%, signal=52%  |
| KEGG_OXIDATIVE_PHOSPHORYLATION                 | 34   | 0.44854143       | 1.2582797                   | 0.1271028  | 0.41741276 | 0.993      | 360         | tags=41%, list=20%, signal=51%  |
| KEGG_ADHERENS_JUNCTION                         | 16   | 0.5058813        | 1.1815656                   | 0.23498233 | 0.55490685 | 0.998      | 177         | tags=38%, list=10%, signal=41%  |
| KEGG_VASCULAR_SMOOTH_MUSCLE_CONTRACTION        | 23   | 0.45507702       | 1.1469922                   | 0.27322406 | 0.5957508  | 0.998      | 803         | tags=70%, list=45%, signal=124% |
| KEGG_PATHWAYS_IN_CANCER                        | 62   | 0.33706322       | 1.0708612                   | 0.3222004  | 0.7352836  | 1          | 177         | tags=19%, list=10%, signal=21%  |
| KEGG_NOD_LIKE_RECEPTOR_SIGNALING_PATHWAY       | 15   | 0.45801345       | 1.061434                    | 0.39784947 | 0.7113767  | 1          | 168         | tags=20%, list=9%, signal=22%   |
| KEGG_GAP_JUNCTION                              | 16   | 0.41684487       | 0.9917708                   | 0.4877193  | 0.8355502  | 1          | 803         | tags=75%, list=45%, signal=134% |
| KEGG_UBIQUITIN_MEDIATED_PROTEOLYSIS            | 19   | 0.3728257        | 0.9110284                   | 0.5963964  | 0.9903539  | 1          | 1089        | tags=79%, list=61%, signal=198% |
| KEGG_ALZHEIMERS_DISEASE                        | 36   | 0.31610516       | 0.8996192                   | 0.62030077 | 0.96248126 | 1          | 694         | tags=58%, list=39%, signal=93%  |
| KEGG_TIGHT_JUNCTION                            | 23   | 0.33862814       | 0.8609135                   | 0.6666667  | 1          | 1          | 151         | tags=22%, list=8%, signal=23%   |
| KEGG_OOCYTE_MEIOSIS                            | 18   | 0.34411          | 0.8483709                   | 0.6841155  | 0.9790818  | 1          | 745         | tags=50%, list=41%, signal=85%  |
| KEGG_GNRH_SIGNALING_PATHWAY                    | 20   | 0.33358154       | 0.83266747                  | 0.71031743 | 0.96224546 | 1          | 803         | tags=60%, list=45%, signal=107% |
| KEGG_HUNTINGTONS_DISEASE                       | 36   | 0.273052         | 0.7812062                   | 0.8270677  | 1          | 1          | 316         | tags=25%, list=18%, signal=30%  |
| KEGG_PROSTATE_CANCER                           | 26   | 0.2696637        | 0.71748567                  | 0.90676415 | 1          | 1          | 180         | tags=19%, list=10%, signal=21%  |
| KEGG_MELANOGENESIS                             | 15   | 0.3066583        | 0.7097814                   | 0.8651079  | 1          | 1          | 803         | tags=67%, list=45%, signal=120% |
| KEGG_WNT_SIGNALING_PATHWAY                     | 21   | 0.28018788       | 0.7051038                   | 0.88014984 | 0.9924696  | 1          | 694         | tags=43%, list=39%, signal=69%  |
| KEGG_ENDOCYTOSIS                               | 24   | 0.25587577       | 0.6754832                   | 0.9158317  | 0.98398334 | 1          | 173         | tags=8%, list=10%, signal=9%    |
| KEGG_AXON_GUIDANCE                             | 23   | 0.24902989       | 0.64084864                  | 0.93142855 | 0.9754338  | 1          | 697         | tags=52%, list=39%, signal=84%  |
| KEGG_MAPK_SIGNALING_PATHWAY                    | 48   | 0.1813503        | 0.5468199                   | 0.99389005 | 0.98354477 | 1          | 890         | tags=63%, list=50%, signal=121% |
| <b>downregulated pathways</b>                  |      |                  |                             |            |            |            |             |                                 |
| KEGG_CELL_ADHESION_MOLECULES_CAMS              | 21   | -0.7015002       | -1.770437                   | 0.00425532 | 0.10417096 | 0.095      | 186         | tags=52%, list=10%, signal=58%  |
| KEGG_ERBB_SIGNALING_PATHWAY                    | 19   | -0.53866065      | -1.3444902                  | 0.10961969 | 1          | 0.959      | 113         | tags=16%, list=6%, signal=17%   |
| KEGG_PHOSPHATIDYLINOSITOL_SIGNALING_SYSTEM     | 16   | -0.5603572       | -1.2864069                  | 0.17351598 | 1          | 0.98       | 159         | tags=19%, list=9%, signal=20%   |
| KEGG_FC_GAMMA_R_MEDIATED_PHAGOCYTOSIS          | 20   | -0.517017        | -1.2772685                  | 0.15384616 | 1          | 0.986      | 56          | tags=15%, list=3%, signal=15%   |
| KEGG_PROGESTERONE_MEDIATED_OOCYTE_MATURATION   | 15   | -0.51773995      | -1.2240347                  | 0.21412803 | 1          | 0.997      | 172         | tags=20%, list=10%, signal=22%  |
| KEGG_GLORECTAL_CANCER                          | 16   | -0.5164038       | -1.2201313                  | 0.21786493 | 0.8893797  | 0.998      | 113         | tags=19%, list=6%, signal=20%   |
| KEGG_GLIOMA                                    | 17   | -0.50699         | -1.2012521                  | 0.2516129  | 0.82415724 | 0.998      | 159         | tags=18%, list=9%, signal=19%   |
| KEGG_LEISHMANIA_INFECTION                      | 17   | -0.5070932       | -1.1863818                  | 0.2553648  | 0.7653934  | 0.999      | 101         | tags=24%, list=6%, signal=25%   |
| KEGG_RIG_I_LIKE_RECEPTOR_SIGNALING_PATHWAY     | 15   | -0.4998152       | -1.1541837                  | 0.29777777 | 0.7748306  | 1          | 165         | tags=33%, list=9%, signal=36%   |
| KEGG_B_CELL_RECEPTOR_SIGNALING_PATHWAY         | 19   | -0.4672158       | -1.1305264                  | 0.27959183 | 0.7630178  | 1          | 56          | tags=11%, list=3%, signal=11%   |
| KEGG_VEGF_SIGNALING_PATHWAY                    | 17   | -0.43429628      | -1.0375208                  | 0.4245283  | 0.94654775 | 1          | 56          | tags=12%, list=3%, signal=12%   |
| KEGG_JAK_STAT_SIGNALING_PATHWAY                | 18   | -0.4210481       | -1.0289407                  | 0.41111112 | 0.8919844  | 1          | 113         | tags=17%, list=6%, signal=18%   |
| KEGG_NATURAL_KILLER_CELL_MEDIATED_CYTOTOXICITY | 18   | -0.4146357       | -1.0049093                  | 0.43949044 | 0.8877711  | 1          | 56          | tags=11%, list=3%, signal=11%   |
| KEGG_PANCREATIC_CANCER                         | 18   | -0.39622676      | -0.98968846                 | 0.45073375 | 0.8653373  | 1          | 56          | tags=11%, list=3%, signal=11%   |

Supplementary Table 5

|                                                                 |    |             |             |            |            |   |                                    |
|-----------------------------------------------------------------|----|-------------|-------------|------------|------------|---|------------------------------------|
| KEGG_CALCIIUM_SIGNALING_PATHWAY                                 | 23 | -0.37924415 | -0.9752521  | 0.4896694  | 0.8431899  | 1 | 159 tags=13%, list=9%, signal=14%  |
| KEGG_LEUKOCYTE_TRANSENDOTHELIAL_MIGRATION                       | 34 | -0.32698435 | -0.92310655 | 0.56646216 | 0.92095846 | 1 | 185 tags=24%, list=10%, signal=26% |
| KEGG_EPITHELIAL_CELL_SIGNALING_IN_HELICOBACTER_PYLORI_INFECTION | 18 | -0.38236952 | -0.90741366 | 0.58099353 | 0.90281904 | 1 | 188 tags=22%, list=10%, signal=25% |
| KEGG_APOPTOSIS                                                  | 17 | -0.36829674 | -0.88370854 | 0.6441441  | 0.90603715 | 1 | 179 tags=18%, list=10%, signal=19% |
| KEGG_CHRONIC_MYELOID_LEUKEMIA                                   | 24 | -0.34108493 | -0.8645039  | 0.64551425 | 0.9025642  | 1 | 113 tags=13%, list=6%, signal=13%  |
| KEGG_NEUROTROPHIN_SIGNALING_PATHWAY                             | 32 | -0.3156462  | -0.84622246 | 0.7070707  | 0.89410394 | 1 | 179 tags=13%, list=10%, signal=14% |
| KEGG_SPLICEOSOME                                                | 22 | -0.31649184 | -0.79836035 | 0.73473686 | 0.9409653  | 1 | 155 tags=9%, list=9%, signal=10%   |
| KEGG_ACUTE_MYELOID_LEUKEMIA                                     | 19 | -0.29380262 | -0.716207   | 0.85350317 | 1          | 1 | 113 tags=11%, list=6%, signal=11%  |
| KEGG_INSULIN_SIGNALING_PATHWAY                                  | 21 | -0.2697769  | -0.6754293  | 0.89439654 | 1          | 1 | 159 tags=10%, list=9%, signal=10%  |
| KEGG_T_CELL_RECEPTOR_SIGNALING_PATHWAY                          | 22 | -0.23402295 | -0.6017927  | 0.9519651  | 1          | 1 | 56 tags=5%, list=3%, signal=5%     |
| KEGG_LONG_TERM_POTENTIATION                                     | 18 | -0.24559428 | -0.5908802  | 0.9483146  | 1          | 1 | 159 tags=11%, list=9%, signal=12%  |
| KEGG_TOLL_LIKE_RECEPTOR_SIGNALING_PATHWAY                       | 16 | -0.24460518 | -0.5750698  | 0.93736017 | 0.96953934 | 1 | 165 tags=13%, list=9%, signal=14%  |

Significant upregulated KEGG pathways (nomalized p value < 0.05)

Significant downregulated KEGG pathways (nomalized p value < 0.05)

**Supplementary Table 6:** VEGF signaling interaction analysis between different cell types in diabetic and non-diabetic skin cells using cell chat

| non-diabetic      | VEGF.outdeg | VEGF.indeg  | VEGF.hub    | VEGF.authority | VEGF.eigen  | VEGF.page_rank | VEGF.betweenness | VEGF.flowbet |
|-------------------|-------------|-------------|-------------|----------------|-------------|----------------|------------------|--------------|
| Endothelial cells | 0           | 0.168234915 | 0           | 1              | 1           | 0.389354847    | 0                | 0            |
| Fibroblasts A     | 0.058494301 | 0           | 1           | 0              | 0.618232261 | 0.081632653    | 0                | 0            |
| Fibroblasts B     | 0.044476288 | 0           | 0.804189412 | 0              | 0.504121336 | 0.081632653    | 0                | 0            |
| Keratinocytes A   | 0.016411162 | 0           | 0.278044774 | 0              | 0.201841137 | 0.081632653    | 0                | 0            |
| Keratinocytes B   | 0           | 0           | 0           | 0              | 0.586620251 | 0.081632653    | 0                | 0            |
| LEC               | 0           | 0.021077115 | 0           | 0.122565594    | 0.213568922 | 0.120849235    | 0                | 0            |
| Myeloid cells     | 0.047925077 | 0           | 0.774837597 | 0              | 0.489520454 | 0.081632653    | 0                | 0            |
| SMC               | 0.022005203 | 0           | 0.369439027 | 0              | 0.254672336 | 0.081632653    | 0                | 0            |

| diabetic          | VEGF.outdeg | VEGF.indeg  | VEGF.hub    | VEGF.authority | VEGF.eigen  | VEGF.page_rank | VEGF.betweenness | VEGF.flowbet |
|-------------------|-------------|-------------|-------------|----------------|-------------|----------------|------------------|--------------|
| Endothelial cells | 0           | 0.127065539 | 1.7019E-16  | 1              | 1           | 0.401768413    | 0                | 0            |
| Fibroblasts A     | 0.054565294 | 0           | 0.814778594 | 1.3267E-16     | 0.61862797  | 0.068741699    | 0                | 0            |
| Fibroblasts B     | 0.066294762 | 0           | 1           | 1.3267E-16     | 0.755801186 | 0.068741699    | 0                | 0            |
| Keratinocytes A   | 0.012709093 | 0           | 0.186711702 | 1.3267E-16     | 0.151718845 | 0.068741699    | 0                | 0            |
| Keratinocytes B   | 0           | 0           | 2.12737E-17 | 6.63348E-17    | 0.417648981 | 0.068741699    | 0                | 0            |
| LEC               | 0.002388086 | 0.081867488 | 0.041573062 | 0.654201709    | 0.685090652 | 0.185781391    | 0                | 0.011940429  |
| Myeloid cells     | 0.046579599 | 0           | 0.697251144 | 1.3267E-16     | 0.53112778  | 0.068741699    | 0                | 0            |
| SMC               | 0.026396193 | 0           | 0.404073179 | 1.3267E-16     | 0.312628291 | 0.068741699    | 0                | 0            |

Interaction probabilities; Rows are senders and columns are receivers

| Non-diabetic      | Endothelial.cells.VEGF | Fibroblasts.A.VEGF | Fibroblasts.B.VEGF | Keratinocytes.A.VEGF | Keratinocytes.B.VEGF | LEC.VEGF    | Myeloid.cells.VEGF | SMC.VEGF |
|-------------------|------------------------|--------------------|--------------------|----------------------|----------------------|-------------|--------------------|----------|
| Endothelial cells | 0                      | 0                  | 0                  | 0                    | 0                    | 0           | 0                  | 0        |
| Fibroblasts A     | 0.052166528            | 0                  | 0                  | 0                    | 0                    | 0.006327773 | 0                  | 0        |
| Fibroblasts B     | 0.042309955            | 0                  | 0                  | 0                    | 0                    | 0.002166333 | 0                  | 0        |
| Keratinocytes A   | 0.014484079            | 0                  | 0                  | 0                    | 0                    | 0.001927083 | 0                  | 0        |
| Keratinocytes B   | 0                      | 0                  | 0                  | 0                    | 0                    | 0           | 0                  | 0        |
| LEC               | 0                      | 0                  | 0                  | 0                    | 0                    | 0           | 0                  | 0        |
| Myeloid cells     | 0.040057195            | 0                  | 0                  | 0                    | 0                    | 0.007867882 | 0                  | 0        |
| SMC               | 0.019217158            | 0                  | 0                  | 0                    | 0                    | 0.002788045 | 0                  | 0        |

Interaction probabilities; Rows are senders and columns are receivers

| Diabetic          | Endothelial.cells.VEGF | Fibroblasts.A.VEGF | Fibroblasts.B.VEGF | Keratinocytes.A.VEGF | Keratinocytes.B.VEGF | LEC.VEGF    | Myeloid.cells.VEGF | SMC.VEGF |
|-------------------|------------------------|--------------------|--------------------|----------------------|----------------------|-------------|--------------------|----------|
| Endothelial cells | 0                      | 0                  | 0                  | 0                    | 0                    | 0           | 0                  | 0        |
| Fibroblasts A     | 0.032119022            | 0                  | 0                  | 0                    | 0                    | 0.022446272 | 0                  | 0        |
| Fibroblasts B     | 0.040697014            | 0                  | 0                  | 0                    | 0                    | 0.025597747 | 0                  | 0        |
| Keratinocytes A   | 0.006972243            | 0                  | 0                  | 0                    | 0                    | 0.00573685  | 0                  | 0        |
| Keratinocytes B   | 0                      | 0                  | 0                  | 0                    | 0                    | 0           | 0                  | 0        |
| LEC               | 0.002388086            | 0                  | 0                  | 0                    | 0                    | 0           | 0                  | 0        |
| Myeloid cells     | 0.027703482            | 0                  | 0                  | 0                    | 0                    | 0.018876118 | 0                  | 0        |
| SMC               | 0.017185693            | 0                  | 0                  | 0                    | 0                    | 0.009210501 | 0                  | 0        |

Difference in probabilities (diabetic – non-diabetic)

|                   | Endothelial.cells.VEGF | Fibroblasts.A.VEGF | Fibroblasts.B.VEGF | Keratinocytes.A.VEGF | Keratinocytes.B.VEGF | LEC.VEGF    | Myeloid.cells.VEGF | SMC.VEGF |
|-------------------|------------------------|--------------------|--------------------|----------------------|----------------------|-------------|--------------------|----------|
| Endothelial cells | 0                      | 0                  | 0                  | 0                    | 0                    | 0           | 0                  | 0        |
| Fibroblasts A     | -0.020047506           | 0                  | 0                  | 0                    | 0                    | 0.016118499 | 0                  | 0        |
| Fibroblasts B     | -0.001612941           | 0                  | 0                  | 0                    | 0                    | 0.023431415 | 0                  | 0        |
| Keratinocytes A   | -0.007511836           | 0                  | 0                  | 0                    | 0                    | 0.003809766 | 0                  | 0        |
| Keratinocytes B   | 0                      | 0                  | 0                  | 0                    | 0                    | 0           | 0                  | 0        |
| LEC               | 0.002388086            | 0                  | 0                  | 0                    | 0                    | 0           | 0                  | 0        |
| Myeloid cells     | -0.012353713           | 0                  | 0                  | 0                    | 0                    | 0.011008236 | 0                  | 0        |
| SMC               | -0.002031465           | 0                  | 0                  | 0                    | 0                    | 0.006422456 | 0                  | 0        |

**Supplementary Table 7:** Demographics of subjects included in this study  
**Samples used for scRNA seq study**

| Sample ID | Diabetes status | Diabetes | Gender | Age | Tissue location | BMI (kg/m²) | HbA1C (%) | Oral       | Insulin | Race             |
|-----------|-----------------|----------|--------|-----|-----------------|-------------|-----------|------------|---------|------------------|
|           |                 | type     |        |     |                 |             |           | medication |         |                  |
| SC_NS-1   | non-diabetic    | N/A      | F      | 37  | Breast          | 48.5        | N/A       | N/A        | N/A     | Caucasian        |
| SC_NS-2   | non-diabetic    | N/A      | M      | 69  | Lower limb      | 34.2        | N/A       | N/A        | N/A     | African American |
| SC_NS-3   | diabetic        | T2DM     | M      | 70  | Lower limb      | 26.4        | 13        | Metformin  | Yes     | Caucasian        |
| SC_NS-4   | diabetic        | T2DM     | M      | 54  | Lower limb      | 27.3        | 7.3       | Metformin  | Yes     | Caucasian        |
| SC_NS-5   | diabetic        | T2DM     | M      | 65  | Lower limb      | 31.9        | 10.3      | Metformin  | Yes     | Caucasian        |
| SC_NS-6   | non-diabetic    | N/A      | M      | 46  | Pannus          | 27.2        | N/A       | N/A        | N/A     | Caucasian        |
| Sc_Skin3  | non-diabetic    | N/A      | F      | 23  | Breast          | 42.2        | N/A       | N/A        | N/A     | African American |
| Sc_Skin4  | non-diabetic    | N/A      | F      | 28  | Breast          | 26.9        | N/A       | N/A        | N/A     | Caucasian        |

**Additional samples used for validation study**

| Sample ID | Diabetes status | Diabetes | Gender | age | Tissue location | BMI (kg/m²) | HbA1C (%) | Oral       | Insulin | Race             |
|-----------|-----------------|----------|--------|-----|-----------------|-------------|-----------|------------|---------|------------------|
|           |                 | type     |        |     |                 |             |           | medication |         |                  |
| NS11      | diabetic        | T2DM     | M      | 79  | Lower limb      | 20.7        | 6.8       | No         | Yes     | Caucasian        |
| NS12      | diabetic        | T2DM     | M      | 54  | Lower limb      | 28.4        | 5.2       | Yes        | No      | African American |
| NS13      | diabetic        | T2DM     | M      | 55  | Pannus          | 95.3        | 7.9       | N/A        | N/A     | Caucasian        |
| NS10      | non-diabetic    | N/A      | F      | 53  | Lower limb      | 35.2        | N/A       | N/A        | N/A     | African American |
| NS7       | non-diabetic    | N/A      | M      | 56  | Pannus          | 28.2        | N/A       | N/A        | N/A     | Caucasian        |
| NS14      | non-diabetic    | N/A      | F      | 52  | Breast          | 29.5        | N/A       | N/A        | N/A     | Caucasian        |
| NS30      | non-diabetic    | N/A      | F      | 55  | Breast          | 32.6        | N/A       | N/A        | N/A     | African American |
| NS17      | diabetic        | T2DM     | M      | 70  | Lower limb      | 37.1        | 11.9      | N/A        | Yes     | Caucasian        |
| NS32      | diabetic        | T2DM     | F      | 54  | Pannus          | 55.5        | 5.4       | N/A        | N/A     | Caucasian        |
